# Supplementary material for: Improved MRI methods to quantify retinal and choroidal blood flow applied to a model of glaucoma
Source: Front Ophthalmol (Lausanne). 2024 May 13;4:1385495. doi: 10.3389/fopht.2024.1385495 (PMC11182105; doi:10.3389/fopht.2024.1385495)
Supplement: Supplementary Table 2 — Retinal and choroidal blood flow (BF) peak values per volume of tissue (mL/mL/min) along the length of the retina for individual animals. Tabs include data for the distance from the optic nerve (µm) from which the BF data were taken, choroidal BF, and retinal BF for each eye. LE: left eye, RE: right eye. *indicates data which were discarded from statistical analysis as described in the methods. [file Table_2.xlsx]

## Sheet: Dist_LE
	Distance (um)
Subject	1	2	3	4	5	6	7	8	9	10	11	12	101	*103	104	105	106	107	108	109	110	111	112	113
Group	C57BL/6J	C57BL/6J	C57BL/6J	C57BL/6J	C57BL/6J	C57BL/6J	C57BL/6J	C57BL/6J	C57BL/6J	C57BL/6J	C57BL/6J	C57BL/6J	DBA/2J	DBA/2J	DBA/2J	DBA/2J	DBA/2J	DBA/2J	DBA/2J	DBA/2J	DBA/2J	DBA/2J	DBA/2J	DBA/2J
																			-1416.67
																			-1395.83
																			-1375
					-1354.17	-1364.58		-1354.17							-1343.75				-1354.17					-1364.58
		-1333.33			-1333.33	-1343.75		-1333.33							-1322.92		-1333.33		-1333.33					-1343.75
		-1312.5			-1312.5	-1322.92		-1312.5	-1312.5			-1312.5			-1302.08		-1312.5	-1312.5	-1312.5	-1312.5			-1312.5	-1322.92
	-1281.25	-1291.67	-1281.25	-1302.08	-1291.67	-1302.08	-1281.25	-1291.67	-1291.67	-1281.25	-1281.25	-1291.67	-1281.25		-1281.25	-1281.25	-1291.67	-1291.67	-1291.67	-1291.67	-1291.67		-1291.67	-1302.08
	-1260.42	-1270.83	-1260.42	-1281.25	-1270.83	-1281.25	-1260.42	-1270.83	-1270.83	-1260.42	-1260.42	-1270.83	-1260.42		-1260.42	-1260.42	-1270.83	-1270.83	-1270.83	-1270.83	-1270.83		-1270.83	-1281.25
	-1239.58	-1250	-1239.58	-1260.42	-1250	-1260.42	-1239.58	-1250	-1250	-1239.58	-1239.58	-1250	-1239.58		-1239.58	-1239.58	-1250	-1250	-1250	-1250	-1250		-1250	-1260.42
	-1218.75	-1229.17	-1218.75	-1239.58	-1229.17	-1239.58	-1218.75	-1229.17	-1229.17	-1218.75	-1218.75	-1229.17	-1218.75		-1218.75	-1218.75	-1229.17	-1229.17	-1229.17	-1229.17	-1229.17		-1229.17	-1239.58
	-1197.92	-1208.33	-1197.92	-1218.75	-1208.33	-1218.75	-1197.92	-1208.33	-1208.33	-1197.92	-1197.92	-1208.33	-1197.92	-1208.33	-1197.92	-1197.92	-1208.33	-1208.33	-1208.33	-1208.33	-1208.33		-1208.33	-1218.75
	-1177.08	-1187.5	-1177.08	-1197.92	-1187.5	-1197.92	-1177.08	-1187.5	-1187.5	-1177.08	-1177.08	-1187.5	-1177.08	-1187.5	-1177.08	-1177.08	-1187.5	-1187.5	-1187.5	-1187.5	-1187.5		-1187.5	-1197.92
	-1156.25	-1166.67	-1156.25	-1177.08	-1166.67	-1177.08	-1156.25	-1166.67	-1166.67	-1156.25	-1156.25	-1166.67	-1156.25	-1166.67	-1156.25	-1156.25	-1166.67	-1166.67	-1166.67	-1166.67	-1166.67		-1166.67	-1177.08
	-1135.42	-1145.83	-1135.42	-1156.25	-1145.83	-1156.25	-1135.42	-1145.83	-1145.83	-1135.42	-1135.42	-1145.83	-1135.42	-1145.83	-1135.42	-1135.42	-1145.83	-1145.83	-1145.83	-1145.83	-1145.83	-1135.42	-1145.83	-1156.25
	-1114.58	-1125	-1114.58	-1135.42	-1125	-1135.42	-1114.58	-1125	-1125	-1114.58	-1114.58	-1125	-1114.58	-1125	-1114.58	-1114.58	-1125	-1125	-1125	-1125	-1125	-1114.58	-1125	-1135.42
	-1093.75	-1104.17	-1093.75	-1114.58	-1104.17	-1114.58	-1093.75	-1104.17	-1104.17	-1093.75	-1093.75	-1104.17	-1093.75	-1104.17	-1093.75	-1093.75	-1104.17	-1104.17	-1104.17	-1104.17	-1104.17	-1093.75	-1104.17	-1114.58
	-1072.92	-1083.33	-1072.92	-1093.75	-1083.33	-1093.75	-1072.92	-1083.33	-1083.33	-1072.92	-1072.92	-1083.33	-1072.92	-1083.33	-1072.92	-1072.92	-1083.33	-1083.33	-1083.33	-1083.33	-1083.33	-1072.92	-1083.33	-1093.75
	-1052.08	-1062.5	-1052.08	-1072.92	-1062.5	-1072.92	-1052.08	-1062.5	-1062.5	-1052.08	-1052.08	-1062.5	-1052.08	-1062.5	-1052.08	-1052.08	-1062.5	-1062.5	-1062.5	-1062.5	-1062.5	-1052.08	-1062.5	-1072.92
	-1031.25	-1041.67	-1031.25	-1052.08	-1041.67	-1052.08	-1031.25	-1041.67	-1041.67	-1031.25	-1031.25	-1041.67	-1031.25	-1041.67	-1031.25	-1031.25	-1041.67	-1041.67	-1041.67	-1041.67	-1041.67	-1031.25	-1041.67	-1052.08
	-1010.42	-1020.83	-1010.42	-1031.25	-1020.83	-1031.25	-1010.42	-1020.83	-1020.83	-1010.42	-1010.42	-1020.83	-1010.42	-1020.83	-1010.42	-1010.42	-1020.83	-1020.83	-1020.83	-1020.83	-1020.83	-1010.42	-1020.83	-1031.25
	-989.583	-1000	-989.583	-1010.42	-1000	-1010.42	-989.583	-1000	-1000	-989.583	-989.583	-1000	-989.583	-1000	-989.583	-989.583	-1000	-1000	-1000	-1000	-1000	-989.583	-1000	-1010.42
	-968.75	-979.167	-968.75	-989.583	-979.167	-989.583	-968.75	-979.167	-979.167	-968.75	-968.75	-979.167	-968.75	-979.167	-968.75	-968.75	-979.167	-979.167	-979.167	-979.167	-979.167	-968.75	-979.167	-989.583
	-947.917	-958.333	-947.917	-968.75	-958.333	-968.75	-947.917	-958.333	-958.333	-947.917	-947.917	-958.333	-947.917	-958.333	-947.917	-947.917	-958.333	-958.333	-958.333	-958.333	-958.333	-947.917	-958.333	-968.75
	-927.083	-937.5	-927.083	-947.917	-937.5	-947.917	-927.083	-937.5	-937.5	-927.083	-927.083	-937.5	-927.083	-937.5	-927.083	-927.083	-937.5	-937.5	-937.5	-937.5	-937.5	-927.083	-937.5	-947.917
	-906.25	-916.667	-906.25	-927.083	-916.667	-927.083	-906.25	-916.667	-916.667	-906.25	-906.25	-916.667	-906.25	-916.667	-906.25	-906.25	-916.667	-916.667	-916.667	-916.667	-916.667	-906.25	-916.667	-927.083
	-885.417	-895.833	-885.417	-906.25	-895.833	-906.25	-885.417	-895.833	-895.833	-885.417	-885.417	-895.833	-885.417	-895.833	-885.417	-885.417	-895.833	-895.833	-895.833	-895.833	-895.833	-885.417	-895.833	-906.25
	-864.583	-875	-864.583	-885.417	-875	-885.417	-864.583	-875	-875	-864.583	-864.583	-875	-864.583	-875	-864.583	-864.583	-875	-875	-875	-875	-875	-864.583	-875	-885.417
	-843.75	-854.167	-843.75	-864.583	-854.167	-864.583	-843.75	-854.167	-854.167	-843.75	-843.75	-854.167	-843.75	-854.167	-843.75	-843.75	-854.167	-854.167	-854.167	-854.167	-854.167	-843.75	-854.167	-864.583
	-822.917	-833.333	-822.917	-843.75	-833.333	-843.75	-822.917	-833.333	-833.333	-822.917	-822.917	-833.333	-822.917	-833.333	-822.917	-822.917	-833.333	-833.333	-833.333	-833.333	-833.333	-822.917	-833.333	-843.75
	-802.083	-812.5	-802.083	-822.917	-812.5	-822.917	-802.083	-812.5	-812.5	-802.083	-802.083	-812.5	-802.083	-812.5	-802.083	-802.083	-812.5	-812.5	-812.5	-812.5	-812.5	-802.083	-812.5	-822.917
	-781.25	-791.667	-781.25	-802.083	-791.667	-802.083	-781.25	-791.667	-791.667	-781.25	-781.25	-791.667	-781.25	-791.667	-781.25	-781.25	-791.667	-791.667	-791.667	-791.667	-791.667	-781.25	-791.667	-802.083
	-760.417	-770.833	-760.417	-781.25	-770.833	-781.25	-760.417	-770.833	-770.833	-760.417	-760.417	-770.833	-760.417	-770.833	-760.417	-760.417	-770.833	-770.833	-770.833	-770.833	-770.833	-760.417	-770.833	-781.25
	-739.583	-750	-739.583	-760.417	-750	-760.417	-739.583	-750	-750	-739.583	-739.583	-750	-739.583	-750	-739.583	-739.583	-750	-750	-750	-750	-750	-739.583	-750	-760.417
	-718.75	-729.167	-718.75	-739.583	-729.167	-739.583	-718.75	-729.167	-729.167	-718.75	-718.75	-729.167	-718.75	-729.167	-718.75	-718.75	-729.167	-729.167	-729.167	-729.167	-729.167	-718.75	-729.167	-739.583
	-697.917	-708.333	-697.917	-718.75	-708.333	-718.75	-697.917	-708.333	-708.333	-697.917	-697.917	-708.333	-697.917	-708.333	-697.917	-697.917	-708.333	-708.333	-708.333	-708.333	-708.333	-697.917	-708.333	-718.75
	-677.083	-687.5	-677.083	-697.917	-687.5	-697.917	-677.083	-687.5	-687.5	-677.083	-677.083	-687.5	-677.083	-687.5	-677.083	-677.083	-687.5	-687.5	-687.5	-687.5	-687.5	-677.083	-687.5	-697.917
	-656.25	-666.667	-656.25	-677.083	-666.667	-677.083	-656.25	-666.667	-666.667	-656.25	-656.25	-666.667	-656.25	-666.667	-656.25	-656.25	-666.667	-666.667	-666.667	-666.667	-666.667	-656.25	-666.667	-677.083
	-635.417	-645.833	-635.417	-656.25	-645.833	-656.25	-635.417	-645.833	-645.833	-635.417	-635.417	-645.833	-635.417	-645.833	-635.417	-635.417	-645.833	-645.833	-645.833	-645.833	-645.833	-635.417	-645.833	-656.25
	-614.583	-625	-614.583	-635.417	-625	-635.417	-614.583	-625	-625	-614.583	-614.583	-625	-614.583	-625	-614.583	-614.583	-625	-625	-625	-625	-625	-614.583	-625	-635.417
	-593.75	-604.167	-593.75	-614.583	-604.167	-614.583	-593.75	-604.167	-604.167	-593.75	-593.75	-604.167	-593.75	-604.167	-593.75	-593.75	-604.167	-604.167	-604.167	-604.167	-604.167	-593.75	-604.167	-614.583
	-572.917	-583.333	-572.917	-593.75	-583.333	-593.75	-572.917	-583.333	-583.333	-572.917	-572.917	-583.333	-572.917	-583.333	-572.917	-572.917	-583.333	-583.333	-583.333	-583.333	-583.333	-572.917	-583.333	-593.75
	-552.083	-562.5	-552.083	-572.917	-562.5	-572.917	-552.083	-562.5	-562.5	-552.083	-552.083	-562.5	-552.083	-562.5	-552.083	-552.083	-562.5	-562.5	-562.5	-562.5	-562.5	-552.083	-562.5	-572.917
	-531.25	-541.667	-531.25	-552.083	-541.667	-552.083	-531.25	-541.667	-541.667	-531.25	-531.25	-541.667	-531.25	-541.667	-531.25	-531.25	-541.667	-541.667	-541.667	-541.667	-541.667	-531.25	-541.667	-552.083
	-510.417	-520.833	-510.417	-531.25	-520.833	-531.25	-510.417	-520.833	-520.833	-510.417	-510.417	-520.833	-510.417	-520.833	-510.417	-510.417	-520.833	-520.833	-520.833	-520.833	-520.833	-510.417	-520.833	-531.25
	-489.583	-500	-489.583	-510.417	-500	-510.417	-489.583	-500	-500	-489.583	-489.583	-500	-489.583	-500	-489.583	-489.583	-500	-500	-500	-500	-500	-489.583	-500	-510.417
	-468.75	-479.167	-468.75	-489.583	-479.167	-489.583	-468.75	-479.167	-479.167	-468.75	-468.75	-479.167	-468.75	-479.167	-468.75	-468.75	-479.167	-479.167	-479.167	-479.167	-479.167	-468.75	-479.167	-489.583
	-447.917	-458.333	-447.917	-468.75	-458.333	-468.75	-447.917	-458.333	-458.333	-447.917	-447.917	-458.333	-447.917	-458.333	-447.917	-447.917	-458.333	-458.333	-458.333	-458.333	-458.333	-447.917	-458.333	-468.75
	-427.083	-437.5	-427.083	-447.917	-437.5	-447.917	-427.083	-437.5	-437.5	-427.083	-427.083	-437.5	-427.083	-437.5	-427.083	-427.083	-437.5	-437.5	-437.5	-437.5	-437.5	-427.083	-437.5	-447.917
	-406.25	-416.667	-406.25	-427.083	-416.667	-427.083	-406.25	-416.667	-416.667	-406.25	-406.25	-416.667	-406.25	-416.667	-406.25	-406.25	-416.667	-416.667	-416.667	-416.667	-416.667	-406.25	-416.667	-427.083
	-385.417	-395.833	-385.417	-406.25	-395.833	-406.25	-385.417	-395.833	-395.833	-385.417	-385.417	-395.833	-385.417	-395.833	-385.417	-385.417	-395.833	-395.833	-395.833	-395.833	-395.833	-385.417	-395.833	-406.25
	-364.583	-375	-364.583	-385.417	-375	-385.417	-364.583	-375	-375	-364.583	-364.583	-375	-364.583	-375	-364.583	-364.583	-375	-375	-375	-375	-375	-364.583	-375	-385.417
	-343.75	-354.167	-343.75	-364.583	-354.167	-364.583	-343.75	-354.167	-354.167	-343.75	-343.75	-354.167	-343.75	-354.167	-343.75	-343.75	-354.167	-354.167	-354.167	-354.167	-354.167	-343.75	-354.167	-364.583
	-322.917	-333.333	-322.917	-343.75	-333.333	-343.75	-322.917	-333.333	-333.333	-322.917	-322.917	-333.333	-322.917	-333.333	-322.917	-322.917	-333.333	-333.333	-333.333	-333.333	-333.333	-322.917	-333.333	-343.75
	-302.083	-312.5	-302.083	-322.917	-312.5	-322.917	-302.083	-312.5	-312.5	-302.083	-302.083	-312.5	-302.083	-312.5	-302.083	-302.083	-312.5	-312.5		-312.5	-312.5	-302.083	-312.5	-322.917
	-281.25	-291.667	-281.25	-302.083	-291.667	-302.083	-281.25	-291.667	-291.667	-281.25	-281.25	-291.667	-281.25	-291.667	-281.25	-281.25	-291.667	-291.667		-291.667	-291.667		-291.667	-302.083
	-260.417	-270.833	-260.417	-281.25	-270.833	-281.25	-260.417	-270.833	-270.833	-260.417	-260.417	-270.833	-260.417	-270.833	-260.417	-260.417	-270.833	-270.833		-270.833	-270.833		-270.833	-281.25
	-239.583	-250	-239.583	-260.417			-239.583		-250	-239.583	-239.583	-250	-239.583	-250		-239.583	-250	-250		-250	-250		-250
	-218.75		-218.75	-239.583			-218.75		-229.167	-218.75	-218.75	-229.167	-218.75	-229.167		-218.75		-229.167		-229.167	-229.167		-229.167
	-197.917		-197.917	-218.75			-197.917			-197.917	-197.917		-197.917	-208.333		-197.917					-208.333
														-187.5
														-166.667
														166.667
	197.917		197.917				197.917			197.917	197.917		197.917	187.5		197.917
	218.75		218.75				218.75			218.75	218.75		218.75	208.333		218.75					208.333
	239.583		239.583	218.75			239.583		229.167	239.583	239.583	229.167	239.583	229.167		239.583		229.167		229.167	229.167		229.167
	260.417	250	260.417	239.583			260.417		250	260.417	260.417	250	260.417	250	260.417	260.417	250	250		250	250		250
	281.25	270.833	281.25	260.417	270.833		281.25	270.833	270.833	281.25	281.25	270.833	281.25	270.833	281.25	281.25	270.833	270.833		270.833	270.833		270.833
	302.083	291.667	302.083	281.25	291.667	281.25	302.083	291.667	291.667	302.083	302.083	291.667	302.083	291.667	302.083	302.083	291.667	291.667		291.667	291.667	302.083	291.667	281.25
	322.917	312.5	322.917	302.083	312.5	302.083	322.917	312.5	312.5	322.917	322.917	312.5	322.917	312.5	322.917	322.917	312.5	312.5		312.5	312.5	322.917	312.5	302.083
	343.75	333.333	343.75	322.917	333.333	322.917	343.75	333.333	333.333	343.75	343.75	333.333	343.75	333.333	343.75	343.75	333.333	333.333	333.333	333.333	333.333	343.75	333.333	322.917
	364.583	354.167	364.583	343.75	354.167	343.75	364.583	354.167	354.167	364.583	364.583	354.167	364.583	354.167	364.583	364.583	354.167	354.167	354.167	354.167	354.167	364.583	354.167	343.75
	385.417	375	385.417	364.583	375	364.583	385.417	375	375	385.417	385.417	375	385.417	375	385.417	385.417	375	375	375	375	375	385.417	375	364.583
	406.25	395.833	406.25	385.417	395.833	385.417	406.25	395.833	395.833	406.25	406.25	395.833	406.25	395.833	406.25	406.25	395.833	395.833	395.833	395.833	395.833	406.25	395.833	385.417
	427.083	416.667	427.083	406.25	416.667	406.25	427.083	416.667	416.667	427.083	427.083	416.667	427.083	416.667	427.083	427.083	416.667	416.667	416.667	416.667	416.667	427.083	416.667	406.25
	447.917	437.5	447.917	427.083	437.5	427.083	447.917	437.5	437.5	447.917	447.917	437.5	447.917	437.5	447.917	447.917	437.5	437.5	437.5	437.5	437.5	447.917	437.5	427.083
	468.75	458.333	468.75	447.917	458.333	447.917	468.75	458.333	458.333	468.75	468.75	458.333	468.75	458.333	468.75	468.75	458.333	458.333	458.333	458.333	458.333	468.75	458.333	447.917
	489.583	479.167	489.583	468.75	479.167	468.75	489.583	479.167	479.167	489.583	489.583	479.167	489.583	479.167	489.583	489.583	479.167	479.167	479.167	479.167	479.167	489.583	479.167	468.75
	510.417	500	510.417	489.583	500	489.583	510.417	500	500	510.417	510.417	500	510.417	500	510.417	510.417	500	500	500	500	500	510.417	500	489.583
	531.25	520.833	531.25	510.417	520.833	510.417	531.25	520.833	520.833	531.25	531.25	520.833	531.25	520.833	531.25	531.25	520.833	520.833	520.833	520.833	520.833	531.25	520.833	510.417
	552.083	541.667	552.083	531.25	541.667	531.25	552.083	541.667	541.667	552.083	552.083	541.667	552.083	541.667	552.083	552.083	541.667	541.667	541.667	541.667	541.667	552.083	541.667	531.25
	572.917	562.5	572.917	552.083	562.5	552.083	572.917	562.5	562.5	572.917	572.917	562.5	572.917	562.5	572.917	572.917	562.5	562.5	562.5	562.5	562.5	572.917	562.5	552.083
	593.75	583.333	593.75	572.917	583.333	572.917	593.75	583.333	583.333	593.75	593.75	583.333	593.75	583.333	593.75	593.75	583.333	583.333	583.333	583.333	583.333	593.75	583.333	572.917
	614.583	604.167	614.583	593.75	604.167	593.75	614.583	604.167	604.167	614.583	614.583	604.167	614.583	604.167	614.583	614.583	604.167	604.167	604.167	604.167	604.167	614.583	604.167	593.75
	635.417	625	635.417	614.583	625	614.583	635.417	625	625	635.417	635.417	625	635.417	625	635.417	635.417	625	625	625	625	625	635.417	625	614.583
	656.25	645.833	656.25	635.417	645.833	635.417	656.25	645.833	645.833	656.25	656.25	645.833	656.25	645.833	656.25	656.25	645.833	645.833	645.833	645.833	645.833	656.25	645.833	635.417
	677.083	666.667	677.083	656.25	666.667	656.25	677.083	666.667	666.667	677.083	677.083	666.667	677.083	666.667	677.083	677.083	666.667	666.667	666.667	666.667	666.667	677.083	666.667	656.25
	697.917	687.5	697.917	677.083	687.5	677.083	697.917	687.5	687.5	697.917	697.917	687.5	697.917	687.5	697.917	697.917	687.5	687.5	687.5	687.5	687.5	697.917	687.5	677.083
	718.75	708.333	718.75	697.917	708.333	697.917	718.75	708.333	708.333	718.75	718.75	708.333	718.75	708.333	718.75	718.75	708.333	708.333	708.333	708.333	708.333	718.75	708.333	697.917
	739.583	729.167	739.583	718.75	729.167	718.75	739.583	729.167	729.167	739.583	739.583	729.167	739.583	729.167	739.583	739.583	729.167	729.167	729.167	729.167	729.167	739.583	729.167	718.75
	760.417	750	760.417	739.583	750	739.583	760.417	750	750	760.417	760.417	750	760.417	750	760.417	760.417	750	750	750	750	750	760.417	750	739.583
	781.25	770.833	781.25	760.417	770.833	760.417	781.25	770.833	770.833	781.25	781.25	770.833	781.25	770.833	781.25	781.25	770.833	770.833	770.833	770.833	770.833	781.25	770.833	760.417
	802.083	791.667	802.083	781.25	791.667	781.25	802.083	791.667	791.667	802.083	802.083	791.667	802.083	791.667	802.083	802.083	791.667	791.667	791.667	791.667	791.667	802.083	791.667	781.25
	822.917	812.5	822.917	802.083	812.5	802.083	822.917	812.5	812.5	822.917	822.917	812.5	822.917	812.5	822.917	822.917	812.5	812.5	812.5	812.5	812.5	822.917	812.5	802.083
	843.75	833.333	843.75	822.917	833.333	822.917	843.75	833.333	833.333	843.75	843.75	833.333	843.75	833.333	843.75	843.75	833.333	833.333	833.333	833.333	833.333	843.75	833.333	822.917
	864.583	854.167	864.583	843.75	854.167	843.75	864.583	854.167	854.167	864.583	864.583	854.167	864.583	854.167	864.583	864.583	854.167	854.167	854.167	854.167	854.167	864.583	854.167	843.75
	885.417	875	885.417	864.583	875	864.583	885.417	875	875	885.417	885.417	875	885.417	875	885.417	885.417	875	875	875	875	875	885.417	875	864.583
	906.25	895.833	906.25	885.417	895.833	885.417	906.25	895.833	895.833	906.25	906.25	895.833	906.25	895.833	906.25	906.25	895.833	895.833	895.833	895.833	895.833	906.25	895.833	885.417
	927.083	916.667	927.083	906.25	916.667	906.25	927.083	916.667	916.667	927.083	927.083	916.667	927.083	916.667	927.083	927.083	916.667	916.667	916.667	916.667	916.667	927.083	916.667	906.25
	947.917	937.5	947.917	927.083	937.5	927.083	947.917	937.5	937.5	947.917	947.917	937.5	947.917	937.5	947.917	947.917	937.5	937.5	937.5	937.5	937.5	947.917	937.5	927.083
	968.75	958.333	968.75	947.917	958.333	947.917	968.75	958.333	958.333	968.75	968.75	958.333	968.75	958.333	968.75	968.75	958.333	958.333	958.333	958.333	958.333	968.75	958.333	947.917
	989.583	979.167	989.583	968.75	979.167	968.75	989.583	979.167	979.167	989.583	989.583	979.167	989.583	979.167	989.583	989.583	979.167	979.167	979.167	979.167	979.167	989.583	979.167	968.75
	1010.42	1000	1010.42	989.583	1000	989.583	1010.42	1000	1000	1010.42	1010.42	1000	1010.42	1000	1010.42	1010.42	1000	1000	1000	1000	1000	1010.42	1000	989.583
	1031.25	1020.83	1031.25	1010.42	1020.83	1010.42	1031.25	1020.83	1020.83	1031.25	1031.25	1020.83	1031.25	1020.83	1031.25	1031.25	1020.83	1020.83	1020.83	1020.83	1020.83	1031.25	1020.83	1010.42
	1052.08	1041.67	1052.08	1031.25	1041.67	1031.25	1052.08	1041.67	1041.67	1052.08	1052.08	1041.67	1052.08	1041.67	1052.08	1052.08	1041.67	1041.67	1041.67	1041.67	1041.67	1052.08	1041.67	1031.25
	1072.92	1062.5	1072.92	1052.08	1062.5	1052.08	1072.92	1062.5	1062.5	1072.92	1072.92	1062.5	1072.92	1062.5	1072.92	1072.92	1062.5	1062.5	1062.5	1062.5	1062.5	1072.92	1062.5	1052.08
	1093.75	1083.33	1093.75	1072.92	1083.33	1072.92	1093.75	1083.33	1083.33	1093.75	1093.75	1083.33	1093.75	1083.33	1093.75	1093.75	1083.33	1083.33	1083.33	1083.33	1083.33	1093.75	1083.33	1072.92
	1114.58	1104.17	1114.58	1093.75	1104.17	1093.75	1114.58	1104.17	1104.17	1114.58	1114.58	1104.17	1114.58	1104.17	1114.58	1114.58	1104.17	1104.17	1104.17	1104.17	1104.17	1114.58	1104.17	1093.75
	1135.42	1125	1135.42	1114.58	1125	1114.58	1135.42	1125	1125	1135.42	1135.42	1125	1135.42	1125	1135.42	1135.42	1125	1125	1125	1125	1125	1135.42	1125	1114.58
	1156.25	1145.83	1156.25	1135.42	1145.83	1135.42	1156.25	1145.83	1145.83	1156.25	1156.25	1145.83	1156.25	1145.83	1156.25	1156.25	1145.83	1145.83	1145.83	1145.83	1145.83	1156.25	1145.83	1135.42
	1177.08	1166.67	1177.08	1156.25	1166.67	1156.25	1177.08	1166.67	1166.67	1177.08	1177.08	1166.67	1177.08	1166.67	1177.08	1177.08	1166.67	1166.67	1166.67	1166.67	1166.67	1177.08	1166.67	1156.25
	1197.92	1187.5	1197.92	1177.08	1187.5	1177.08	1197.92	1187.5	1187.5	1197.92	1197.92	1187.5	1197.92	1187.5	1197.92	1197.92	1187.5	1187.5	1187.5	1187.5	1187.5	1197.92	1187.5	1177.08
	1218.75	1208.33	1218.75	1197.92	1208.33	1197.92	1218.75	1208.33	1208.33	1218.75	1218.75	1208.33	1218.75	1208.33	1218.75	1218.75	1208.33	1208.33	1208.33	1208.33	1208.33	1218.75	1208.33	1197.92
	1239.58	1229.17	1239.58	1218.75	1229.17	1218.75	1239.58	1229.17	1229.17	1239.58	1239.58	1229.17	1239.58	1229.17	1239.58	1239.58	1229.17	1229.17	1229.17	1229.17	1229.17	1239.58	1229.17	1218.75
	1260.42	1250	1260.42	1239.58	1250	1239.58	1260.42	1250	1250	1260.42	1260.42	1250	1260.42	1250	1260.42	1260.42	1250	1250	1250	1250	1250	1260.42	1250	1239.58
	1281.25	1270.83	1281.25	1260.42	1270.83	1260.42	1281.25	1270.83	1270.83	1281.25	1281.25	1270.83	1281.25		1281.25	1281.25	1270.83	1270.83	1270.83	1270.83	1270.83	1281.25	1270.83	1260.42
		1291.67		1281.25	1291.67	1281.25		1291.67	1291.67			1291.67			1302.08		1291.67	1291.67	1291.67	1291.67	1291.67	1302.08	1291.67	1281.25
		1312.5		1302.08	1312.5	1302.08		1312.5	1312.5			1312.5			1322.92		1312.5	1312.5	1312.5	1312.5		1322.92	1312.5	1302.08
		1333.33			1333.33	1322.92		1333.33							1343.75		1333.33		1333.33			1343.75		1322.92
					1354.17	1343.75		1354.17											1354.17			1364.58		1343.75
						1364.58													1375			1385.42		1364.58
																			1395.83
																			1416.67

## Sheet: ChBF_LE
	Choroidal Blood Flow (mL/mL/min)
Subject	1	2	3	4	5	6	7	8	9	10	11	12	101	*103	104	105	106	107	108	109	110	111	112	113
Group	C57BL/6J	C57BL/6J	C57BL/6J	C57BL/6J	C57BL/6J	C57BL/6J	C57BL/6J	C57BL/6J	C57BL/6J	C57BL/6J	C57BL/6J	C57BL/6J	DBA/2J	DBA/2J	DBA/2J	DBA/2J	DBA/2J	DBA/2J	DBA/2J	DBA/2J	DBA/2J	DBA/2J	DBA/2J	DBA/2J
																			1.69086
																			2.6477
																			2.90655
					6.29818	2.8903		4.37967							2.07359				2.69178					3.60958
		4.55581			6.51578	3.18912		5.06025							2.04597		3.48801		2.18271					3.37329
		5.40494			6.40532	4.01243		5.61509	4.03497			5.98314			2.40066		3.37439	3.98936	1.62283	3.21058			2.68708	3.13922
	5.5258	5.52198	5.36604	3.99144	6.38799	4.33374	4.3765	5.63312	3.55446	3.97672	4.8485	4.98091	0.569288		2.69008	5.97452	4.31231	4.56213	1.58882	3.49919	5.73498		2.807	3.35661
	5.48496	5.15522	5.43462	4.19666	6.91972	4.02706	4.50126	5.97937	3.16465	4.02396	4.9979	4.31078	0.690732		2.76853	5.87728	4.53201	5.33952	1.8809	3.24812	5.35382		2.85899	4.15069
	5.07467	5.35106	5.29491	4.31199	7.43752	3.72749	4.62438	6.41117	3.07491	4.00389	5.06299	4.83986	0.8356		2.92136	6.67185	4.57492	5.21094	2.21801	2.74904	3.95674		3.09297	5.04885
	4.74236	5.7004	5.27824	5.18883	7.65948	3.69363	4.66395	6.6999	3.4066	3.63376	5.06257	5.04694	1.24408		2.94486	7.71172	4.49734	3.72738	2.93753	2.32277	2.99184		3.24779	5.78644
	5.06814	5.85666	5.50339	5.51737	7.49185	3.80117	4.46459	6.98078	4.02806	3.28558	5.37162	4.54536	2.10751	4.05255	3.08843	8.03831	4.77832	2.03484	3.58571	1.94732	3.30063		3.27404	6.11549
	5.9347	5.78078	5.96595	5.18222	7.18814	4.11389	4.40145	7.34812	4.38687	3.34633	5.68361	5.20335	2.60915	3.74425	3.36585	7.6878	5.2256	1.3926	4.10742	1.39159	3.61338		3.31219	6.94869
	6.62716	5.46069	6.11952	4.9228	7.17436	4.63323	4.56953	7.3567	4.39849	3.85805	5.6713	6.50752	2.32838	3.94079	3.38839	7.74572	5.5675	2.7299	4.23989	0.775547	3.82618		3.19144	6.38405
	7.46767	5.45234	5.90795	4.54189	7.09399	5.45307	4.71256	7.23755	4.23693	4.45422	5.71532	6.89769	2.63339	4.0925	3.61274	8.02949	5.97955	3.96447	4.59455	1.06953	3.85609	3.2253	2.73024	5.21519
	6.82792	5.84903	6.084	4.50424	6.71752	6.18901	4.75031	7.07229	4.04033	4.73376	5.74586	6.94284	3.56496	3.58189	3.62075	8.29263	6.38484	4.52042	5.19723	2.52658	3.14489	4.47101	2.63424	4.59519
	6.02486	6.38176	6.66306	5.19066	6.22162	6.32977	5.13606	6.85859	4.573	5.00431	5.93593	6.87275	4.6612	2.89986	3.43534	8.50312	6.36504	5.3729	5.62929	3.43081	2.84959	4.78785	2.58988	4.68968
	6.60752	6.92599	7.32018	5.63435	6.28047	5.9526	5.45172	6.68942	5.53479	5.4764	5.76754	6.46988	5.09791	3.04391	3.45849	8.45843	6.81718	6.05786	5.90381	3.37559	3.50024	4.14153	2.93468	5.1079
	7.72665	7.03607	7.46253	5.77808	6.86697	6.22348	5.32914	6.57402	6.03803	5.9695	5.71464	6.12781	4.41671	3.68467	3.4207	8.63949	7.54801	5.36858	6.08789	3.15008	4.55492	3.90897	3.76336	5.77692
	8.50935	7.50608	7.24137	5.67649	7.42622	6.74344	5.64462	6.65747	6.21551	6.4198	6.30476	5.87806	4.66799	4.12144	3.42597	8.82983	7.79751	3.80518	6.00842	3.16121	5.21613	4.12571	4.58557	6.11398
	8.87069	7.93231	7.08869	5.64497	7.6498	7.18139	6.15797	6.98913	7.24855	6.57096	7.09404	5.98876	5.06338	4.76722	3.38704	8.10091	8.18318	3.62508	6.19755	3.74341	5.80008	4.66895	4.60956	6.0556
	9.90411	7.7748	6.93166	5.76751	7.47784	6.36328	6.3597	7.47948	8.78675	6.59574	7.35876	6.52424	4.88253	5.37077	3.0988	6.82626	8.64317	4.54056	6.02237	3.49534	6.14859	5.7105	4.15401	6.1235
	10.1854	7.57293	6.82451	6.02724	7.66092	5.51008	6.41175	8.40563	9.31073	6.51064	6.9464	6.90963	4.72381	5.64704	2.30828	7.03361	8.67484	5.6141	5.67547	2.63879	6.74237	6.02894	4.39929	6.13178
	10.678	7.56368	7.05148	6.1955	7.80181	5.75329	6.87447	8.96332	9.37313	6.77728	6.36292	6.68858	5.26925	5.84318	1.89376	8.32752	8.18016	7.11586	6.09022	2.65162	7.03348	5.65393	5.25655	6.29989
	11.2283	8.55403	7.29025	6.55135	7.80688	6.03159	7.16298	8.64919	9.33151	7.37899	5.79198	6.38005	5.85452	6.26078	2.50714	8.75624	7.7437	7.11399	6.66347	3.23357	6.74194	4.78179	5.82622	6.79571
	11.2898	9.85404	7.02129	6.76905	7.96459	6.58501	6.46673	8.19426	9.31807	8.65107	5.85826	6.8453	5.41585	6.7227	3.38044	8.69729	7.3406	6.27142	6.0781	3.92297	6.16352	4.32655	6.21888	7.21844
	10.4073	10.0442	6.37522	6.89266	8.03538	7.71803	5.88293	7.72797	9.26042	10.2591	6.0886	7.39272	5.038	6.7328	3.69007	8.56811	6.86017	5.95044	5.48418	4.01896	5.88145	5.21616	7.04297	7.49164
	9.65981	9.84226	5.9147	7.05385	7.88633	7.72025	6.29209	7.31331	9.26482	10.1168	6.55254	7.71432	5.46348	6.8408	3.68484	8.25263	6.39242	5.851	5.90817	3.45186	6.20294	5.88804	7.30394	7.4197
	9.8705	10.3526	6.05676	6.92331	7.93625	7.02451	6.74691	7.26675	10.1097	9.96058	7.15185	7.50925	5.63167	7.17111	3.80732	7.93988	6.50921	6.16292	6.75552	3.5273	6.19344	6.16589	7.18385	7.52232
	9.91363	10.946	6.65086	6.87953	7.81169	6.94629	6.47464	7.82656	10.605	10.187	7.2224	7.68222	5.12166	8.06035	3.99396	8.34737	6.81675	7.78931	6.34177	3.68932	6.27605	6.53487	6.89269	7.88321
	9.53508	10.655	6.96443	7.74239	7.55937	7.57323	6.46861	8.27405	10.2707	10.1465	6.88606	8.29972	4.45431	8.35678	4.08864	9.38695	6.92457	8.76904	6.07508	3.55881	6.62429	6.38575	6.76397	8.06643
	9.87732	10.4003	7.06534	8.67461	7.51745	7.72616	6.74259	8.2884	10.7835	10.396	6.8859	8.16338	4.20928	7.74456	4.83156	9.7375	7.0614	7.70258	7.2683	2.95346	7.16343	5.74254	6.84303	7.54532
	10.9118	10.8079	7.59689	7.87	7.89023	7.53077	7.1959	7.93017	11.0288	10.6646	6.98735	8.42584	3.9822	8.24703	5.93536	9.44676	7.34543	6.82059	8.67537	2.22848	7.57764	5.85073	7.21393	7.2787
	11.7085	11.6553	8.20012	7.08403	8.71017	7.53235	7.1581	7.76662	10.7557	10.0901	6.59042	9.49102	3.40903	9.45303	6.34515	10.1605	7.77328	7.29071	8.87334	2.21028	7.53747	6.64112	7.3439	7.86056
	11.5541	11.1556	8.25737	7.54123	9.53	8.13896	6.77785	7.78474	10.6438	9.93809	6.5809	10.6255	3.55799	9.54797	6.28868	10.3757	7.77018	7.76084	8.48611	2.49082	7.25391	6.65765	7.33551	8.35659
	11.3992	11.031	8.26518	7.92709	9.70613	9.02881	7.06424	8.08707	11.3529	10.2782	7.42517	11.1143	4.60438	8.86851	6.18256	9.66191	7.42406	6.77543	8.32131	2.57374	7.56415	5.43508	7.24758	8.15637
	11.1447	11.3119	8.50178	8.23554	9.60428	9.18555	7.39975	8.77895	11.4359	10.1453	7.78743	11.3936	5.96138	8.97183	6.11382	8.97435	7.49983	6.70474	8.21274	2.44499	8.04712	4.55908	7.19267	7.57594
	11.1991	11.1747	8.29546	8.50408	9.53471	8.99156	7.6645	8.96906	10.5399	10.5014	7.6712	11.5078	6.05052	9.10502	6.30262	7.72757	7.90957	6.57221	8.55313	2.84577	8.75804	5.16336	7.39848	7.584
	12.0145	11.3751	7.80181	8.92992	9.53984	9.68705	7.61797	8.72003	11.0055	10.775	7.26871	11.5661	5.10968	9.8918	6.22826	7.25711	7.8824	5.63212	8.62979	3.65417	9.81827	6.13618	7.77801	8.25518
	12.4398	11.956	7.37616	8.86	9.50394	9.88539	7.17472	8.67856	11.7973	9.75702	6.91871	10.6485	5.03346	10.1895	5.44772	7.08057	7.69013	5.87707	7.83264	4.168	9.8749	6.72659	8.11475	8.91164
	11.4816	11.6997	7.54661	9.23177	9.07322	9.90752	7.09228	8.82898	11.9442	9.06967	6.71277	10.5014	6.21096	9.07173	5.2973	6.1573	7.66831	7.64247	6.72668	4.62412	9.03741	7.42765	8.32162	9.36096
	12.0586	11.7711	7.71846	9.74216	8.84993	9.85965	7.00559	9.07442	12.5178	9.0292	6.60241	11.2256	6.53942	8.59796	5.28159	5.49896	7.47867	8.88202	5.63037	4.42913	8.99208	8.6685	8.05193	9.54488
	12.3534	11.6017	7.98936	9.32455	8.93956	9.7799	6.13241	8.78937	11.8025	9.00161	6.60868	11.514	6.28355	8.97257	4.23356	5.98884	7.19782	8.32159	5.28827	3.6122	9.46379	8.98778	7.77493	8.75424
	11.559	10.5614	8.24537	9.03452	9.37141	10.2367	6.1848	8.66217	10.2542	8.47106	6.69129	11.3772	6.57052	8.67741	3.68798	6.73611	6.92338	6.7913	4.75782	3.68135	10.0077	8.42548	7.84852	7.62593
	11.5278	9.82345	7.83848	9.22171	10.0343	9.89456	6.30948	8.9452	9.74701	7.56657	7.08405	11.2646	6.8533	7.87814	5.02141	6.55377	7.14198	6.11017	4.1398	4.12394	10.7046	7.82463	8.5192	7.18036
	11.5784	10.4235	7.87309	9.27565	10.7885	8.93764	7.37814	8.94707	9.92873	7.80306	7.11163	11.2997	5.96182	7.52717	6.12587	6.1747	7.69687	6.91813	3.90919	4.59467	11.1189	7.87201	9.69036	6.89604
	12.4184	11.157	8.31718	9.09069	10.8896	8.80943	8.05973	8.76619	10.3592	7.96802	7.14685	10.9684	5.36489	7.67553	5.71295	6.58847	7.87953	7.7908	3.97464	4.62026	10.4785	6.88238	10.5738	6.45823
	12.1312	11.0843	8.86889	8.77451	11.1985	9.14727	8.02743	8.86464	9.9909	7.29817	7.14202	10.5915	5.5252	7.48113	5.11831	6.36139	7.52207	8.03124	4.13996	4.14374	9.22732	6.3077	10.4706	6.36118
	11.0642	11.0793	9.32386	8.14217	11.6921	9.58706	7.79639	9.15278	10.1002	6.91024	7.10473	10.5002	6.33712	7.43917	5.66884	6.11371	7.41687	7.56744	4.58734	4.06687	8.49762	6.62475	10.0844	7.11568
	11.057	11.2375	9.47552	7.37412	11.6782	10.1295	7.79832	8.63347	10.1586	7.40127	7.35519	10.4794	6.79392	7.27659	5.81277	6.23291	7.68869	7.22224	5.12028	3.50297	8.88853	6.39503	9.61588	7.71124
	10.9409	11.2063	9.13586	7.26908	11.2656	10.2201	7.61803	8.61214	9.71739	7.88117	7.39908	10.3144	6.72215	7.74648	4.70602	6.35981	7.54575	7.35066	5.53179	2.91828	9.73461	6.03906	8.96166	7.75962
	11.2781	11.2255	8.43232	7.90212	11.9533	9.81055	7.17271	8.55827	9.43515	8.13574	7.09361	10.358	6.26783	8.41221	3.76121	6.58474	6.6852	7.45623	5.4012	3.67569	9.88794	6.28835	8.1669	8.26663
	11.5811	11.0953	7.86823	8.27357	12.1703	9.95975	7.13488	8.37031	9.59673	8.81388	6.7621	10.1213	5.59877	8.69916	3.93927	6.63752	6.62243	7.03134	5.64612	4.96053	8.91057	6.09283	7.59028	8.83176
	11.6661	10.5398	7.93955	7.90664	11.1468	10.6094	7.65254	8.62402	9.61561	9.56715	6.91762	9.99655	5.47737	8.05613	4.1396	6.71959	5.81552	5.77054	6.06543	5.93846	7.99853	5.78956	7.72167	8.80845
	12.1523	10.0689	8.19874	7.33627	9.15088	10.2819	7.8558	8.68331	10.0553	9.60627	7.09637	10.3879	6.24322	7.57654	4.18815	7.05894	4.68114	4.0541		6.95146	7.83145	5.49269	7.82438	8.21181
	11.2325	9.37946	8.174	6.35073	8.60996	9.39183	6.97329	8.31973	10.1784	9.44262	6.79382	10.8115	6.80616	8.13801	4.03598	7.73557	4.25994	2.55473		7.21425	7.3034		7.48416	7.59544
	10.1226	9.33062	8.32296	6.03239	8.89084	8.78321	6.3909	9.45148	9.28931	9.3102	6.3853	11.1011	6.74506	8.61608	4.30304	7.83406	4.06749	3.20017		6.72237	6.59001		7.60634	7.25848
	9.8345	9.53643	8.14785	6.27301			6.83708		8.55701	8.6016	6.32928	10.5178	5.32388	8.58841		7.31131	4.52082	3.03248		6.76761	6.11313		8.29752
	10.3121		7.85627	6.19503			7.05054		8.05276	8.02182	6.32555	9.9062	4.9731	8.24845		6.90329		2.19786		7.1996	5.9475		8.70017
	11.1807		7.86319	6.54432			6.53423			8.18005	6.59585		6.11615	8.16885		6.49895					6.50638
														8.58443
														9.06604
														6.91173
	6.9466		6.32021				5.16428			8.26373	6.76462		5.39775	6.22582		5.43089
	7.70695		6.91414				5.48584			8.52523	7.51816		6.80706	5.45473		5.97351					7.24747
	8.5203		7.50528	7.38735			5.9469		7.03895	8.59437	7.85981	8.63193	7.08425	5.3549		5.92277		6.29141		2.68492	8.36626		6.7454
	8.76288	8.8843	7.47573	6.92457			6.03558		7.94056	8.04523	7.38023	8.55721	6.95519	5.54003	4.88701	5.71489	6.75937	5.72242		2.59716	8.41683		7.70013
	8.51382	9.27343	7.50233	6.53499	6.9674		5.85212	8.30482	8.21731	7.36935	6.68593	8.44323	6.46798	6.08652	5.34586	6.08239	7.55678	5.77492		2.80312	7.98044		8.0151
	8.06442	9.53541	7.88345	6.39369	8.3413	7.32697	5.38897	7.92796	8.23675	7.17645	6.61091	8.1108	6.15534	8.07824	5.59478	6.4435	7.54197	6.04861		3.23777	7.56398	4.00295	7.68524	8.47151
	8.35402	9.72804	8.18013	5.95126	9.50966	7.26115	4.73949	6.92926	8.2377	7.43582	7.09723	7.8348	6.17199	8.10591	5.83474	6.32302	7.29176	5.48006		3.16897	6.89274	3.6428	7.39157	9.19826
	9.1007	9.31335	7.99878	5.36881	9.80112	7.52658	4.18269	6.38628	8.01663	7.83099	7.41295	8.07995	6.13168	7.47979	5.88932	5.86851	7.17639	4.9857	5.36886	2.98279	6.00408	4.14229	7.18221	9.60813
	9.81512	8.83972	7.70885	5.72999	9.7143	8.16441	4.94487	6.07608	7.82891	7.77263	7.51002	8.40326	5.85593	7.23183	5.83998	5.58414	7.61877	3.9104	4.76394	2.74714	5.77008	5.00334	6.54504	9.68967
	10.2217	8.38736	7.61999	7.3052	9.49925	8.65109	5.83581	5.8283	7.87795	7.00509	6.72775	8.36728	6.02777	7.19557	5.76556	5.43569	7.88328	4.12032	4.2564	2.41275	6.02899	5.8616	5.98502	9.49701
	9.85744	8.41024	7.92205	6.97532	8.8145	8.48795	5.99987	5.99539	7.88115	6.47472	6.3031	7.52607	6.80831	7.1037	5.65521	5.57438	7.61424	5.48323	3.86826	2.66792	6.58928	6.58414	5.65632	9.84525
	9.27138	8.79362	8.11834	6.44892	8.736	7.93882	5.85756	6.28545	7.52455	6.6791	6.59501	6.92225	7.21202	7.27847	5.41054	5.22776	7.35323	6.65332	3.70315	3.17857	6.89858	6.9643	5.82084	10.5521
	9.04645	9.22877	7.86178	6.2638	9.06737	7.56211	5.67852	6.52494	7.183	6.77796	6.65679	6.92228	7.09555	7.56664	5.52998	5.16473	7.50549	7.56482	3.91932	3.45744	7.00244	7.26239	6.22524	10.8119
	9.21389	9.43666	7.82245	6.09847	9.35784	7.11035	5.76726	6.60022	7.14656	6.50512	6.33174	7.1493	6.47661	7.77267	6.16316	5.25103	7.78814	7.55461	4.19687	3.68708	7.17413	8.02897	6.54837	11.0696
	9.3631	9.1591	7.72878	5.85748	9.35567	6.23578	5.90882	6.60944	7.40792	5.96625	6.31117	7.2816	5.40296	7.7929	6.596	5.06384	7.79415	6.56807	4.06061	3.57805	7.26918	8.58024	6.61403	10.8547
	9.37136	8.83579	7.65346	6.2741	9.27497	6.38475	5.71037	6.73306	7.56972	5.71186	6.90773	7.57159	5.79112	8.0599	6.34433	4.45478	7.51723	6.11234	3.68507	3.16594	7.21066	8.32365	6.72509	9.76419
	9.23363	8.75132	7.6106	6.84595	8.87679	7.2636	5.673	6.80077	7.59825	6.56797	7.14844	8.01159	6.59454	7.92197	5.82924	4.67281	7.10402	5.71725	3.79942	2.83863	7.102	7.54347	6.98435	8.90474
	8.98157	8.53125	7.90143	7.53439	8.49724	8.29278	5.03631	7.10101	7.81678	7.45922	6.7644	8.47588	7.40686	7.86501	4.84201	5.54444	6.5163	5.12473	4.19678	3.15639	7.15174	6.82825	7.15012	8.45743
	9.26975	8.41345	8.38546	7.96276	7.65935	8.46438	4.39723	7.51071	8.26417	7.62274	6.46895	8.84901	6.93776	8.38756	4.44808	6.29765	6.1554	4.01624	4.53572	3.70847	8.00066	6.74694	7.3596	8.67493
	9.46077	7.95442	7.37697	7.75352	6.78023	8.17874	4.47485	7.28362	8.45032	7.11564	6.3624	8.70353	6.69788	8.16192	4.87701	6.63429	6.0326	2.66297	4.6521	4.22046	9.00034	6.87597	7.61563	8.73396
	9.04057	7.38597	6.64165	7.30913	6.67742	7.72746	4.75013	6.73892	8.36928	6.48135	5.80225	8.31599	7.11468	7.29651	5.07586	6.64002	6.0614	2.26001	4.87997	4.73255	9.47195	6.12958	7.69523	7.86875
	8.73641	7.47711	6.77472	7.17121	6.86991	7.10843	5.28367	6.53319	8.28298	6.1789	5.5158	7.5014	7.22256	6.88596	4.84258	6.52235	6.27485	2.47484	5.03937	5.20129	9.19318	5.14222	7.95138	6.72644
	8.60833	8.05598	7.454	7.30077	7.05199	6.52466	5.81176	6.43954	8.17774	6.11667	5.71632	7.46098	7.38108	6.81183	4.63924	6.18778	6.05158	3.22816	5.04983	5.44746	8.10425	5.08212	7.92684	6.36844
	8.67683	8.4686	7.917	7.13911	7.16582	6.22434	6.00272	6.58163	8.21588	6.48159	6.31349	7.66445	6.96652	6.67902	5.01939	5.51601	5.8895	3.89475	5.21324	5.7637	7.39826	5.10358	7.43638	6.3966
	8.52543	8.78067	7.21154	6.03937	7.38971	6.03693	6.185	6.11705	8.4222	7.00175	6.72646	7.58782	6.10822	6.68277	4.53585	5.02022	5.54953	4.15074	5.69059	6.20582	7.83164	5.06418	6.71053	6.72166
	8.02718	8.58169	6.43428	5.76012	7.24	5.76124	6.13707	5.86222	8.55109	7.35961	6.5237	7.51214	5.24305	6.83717	4.05852	4.64914	4.99451	4.35308	6.19221	6.7292	7.89562	5.19898	6.51919	6.94604
	7.66332	8.03174	6.02375	5.81839	7.15787	5.50567	5.97095	6.08146	8.56832	7.44756	6.30877	7.56094	4.76161	7.02166	3.83688	4.90143	5.02659	4.8186	6.60124	6.41066	7.14081	5.64715	6.62721	6.29238
	7.625	7.92698	6.21867	6.25395	6.59242	5.85679	6.07517	6.09948	8.58289	6.84951	6.25226	7.7018	5.06405	6.98758	3.37639	6.03029	5.66207	5.18457	6.59323	5.89519	6.96268	6.25943	6.86515	5.51104
	7.63041	8.03894	6.66622	6.34483	6.47152	6.34238	5.76127	6.16982	8.62533	6.00221	6.26131	8.11538	5.62273	6.81663	3.00306	6.92579	5.81773	5.09281	6.10338	5.5992	6.81313	6.58477	7.06299	5.12656
	7.74548	8.0112	6.81045	5.54316	6.94471	6.77897	5.20283	6.15181	8.66817	5.33199	6.24394	8.30074	5.60112	6.71237	3.09324	6.94925	5.37682	5.07434	4.53786	5.31582	6.40904	6.04864	7.3218	5.34009
	7.90138	7.93582	6.59496	5.88238	7.41107	6.98442	5.03593	6.18259	8.90517	5.94289	5.98636	8.1543	5.01626	6.85363	3.37697	6.763	4.70798	4.91013	4.17277	5.20745	6.14886	5.47068	7.58649	5.59106
	8.11175	8.06948	6.37765	6.19623	7.29593	7.18558	5.78673	6.27331	8.92815	6.94643	5.52436	8.14442	4.34691	7.08978	3.68131	5.43512	4.76575	4.62898	4.73971	5.23446	6.02384	6.14641	7.92611	5.34657
	8.324	8.25882	5.88941	6.45823	6.68479	7.33477	7.37325	6.44659	8.82941	7.28945	5.22931	8.20658	4.56094	7.28921	3.94203	4.42755	5.35073	4.83801	5.6941	5.36264	6.16267	7.02886	8.40925	5.18129
	8.31593	8.36466	5.97623	6.6642	6.20891	7.34513	7.33018	6.48715	8.45192	7.41688	5.25128	8.34502	5.09332	7.55473	3.80815	4.57966	5.55686	4.9706	5.33125	5.49627	7.02243	7.01401	8.67662	5.25156
	7.87329	8.36251	6.27606	6.42056	6.29724	6.95686	6.87793	6.42648	8.55754	7.52254	5.84701	8.66515	5.63262	7.39015	3.71559	5.23513	5.60699	5.02498	4.57388	5.3356	7.38332	7.3598	8.70497	5.37861
	7.29169	8.07892	7.17877	5.8002	6.91742	6.75207	5.44734	6.69099	8.74264	8.17578	6.4293	8.85826	6.16934	7.32133	3.49514	5.94453	5.28832	4.70903	4.07536	4.92851	7.30392	7.33138	8.5156	5.74474
	7.23652	7.84833	7.46682	5.86473	7.78841	6.94342	5.30825	7.05985	8.67637	8.9677	6.46968	9.00723	5.85544	7.57136	3.1118	5.63917	4.96995	3.9868	3.72755	4.64273	7.23065	7.41838	8.2207	6.11475
	7.22414	7.50906	7.26693	6.13495	7.74787	6.9142	6.05599	7.19722	8.71735	9.49458	5.96885	9.18953	5.19266	8.21701	2.56348	5.20531	5.11976	3.92129	3.59382	5.11094	7.19777	7.63465	8.25194	6.14172
	7.13586	7.98173	7.04822	6.18251	6.58598	6.92618	6.81488	7.14223	8.98023	9.61867	5.73651	9.20166	4.69841	8.86428	2.40317	4.87172	5.13229	4.98076	3.55829	5.46089	7.46723	7.7071	8.42362	6.31953
	7.21483	8.61845	6.52994	6.54492	5.88912	7.00029	7.03591	6.81382	8.76411	9.18982	5.85981	9.55196	4.52453	8.55204	2.48345	4.61363	4.94538	5.47622	3.63301	5.49936	8.19445	6.92685	8.39788	6.21678
	7.7884	9.08217	6.39352	6.94418	5.92332	7.02683	6.43405	6.40066	8.3267	8.74397	5.92318	9.5656	5.40915	7.75349	2.36676	4.65877	4.74138	4.65318	3.68171	5.4067	8.35728	5.88021	8.21852	5.55882
	8.44271	8.81046	6.73735	6.82138	6.78754	7.0031	6.06073	6.42991	8.49811	8.54225	5.99839	8.9692	6.79304	7.66388	2.59221	5.48231	4.47099	4.80116	4.05825	5.19291	7.73961	5.6435	8.2349	5.41219
	9.07439	8.42755	7.20676	6.37811	7.74516	7.08122	6.05296	6.68006	8.34965	8.5919	5.75143	8.43808	6.94359	7.92592	2.76734	6.50392	4.14918	6.25717	4.34687	5.10343	7.06265	5.85774	7.96788	5.5056
	8.97663	8.5387	7.31375	5.8507	6.82098	6.90521	5.87055	6.58452	8.05606	8.5496	5.42951	8.4053	6.00196	8.33288	2.60152	6.38862	4.59844	8.00768	4.61392	5.21121	6.46121	6.17528	7.88111	6.86088
	8.87462	9.08798	6.70181	5.67707	6.46803	5.91568	5.92071	6.27124	7.75087	8.38619	5.44961	8.9185	5.73873	8.72715	2.50314	5.51755	5.58955	7.55056	4.63953	5.2472	6.42534	6.43294	7.82563	7.8574
	8.76488	9.419	6.53092	5.65465	7.22788	5.67989	5.91365	5.81065	7.49222	7.89617	5.68521	9.44447	5.88677	8.70368	2.48699	4.25628	5.83118	7.02096	4.45335	5.46347	6.52412	6.05081	7.91578	7.12512
	8.3735	9.26374	7.16155	5.76757	8.45176	6.49584	6.08563	5.97886	7.77527	7.25518	5.8866	9.75518	5.74367	8.53321	2.42598	4.0416	5.71719	6.86874	4.88948	5.24549	6.05332	5.60041	8.17971	6.36379
	8.34849	8.65339	7.46557	6.18349	8.74941	6.63411	6.35082	6.48795	8.16124	6.94071	5.97174	10.0179	5.71702	8.30324	2.77519	4.88232	5.65503	6.805	5.27036	5.12197	5.93265	5.0169	8.37764	6.18644
	8.82814	8.34555	7.50207	6.42162	8.36789	6.45263	6.13182	6.70041	8.34065	6.81034	6.16841	10.424	5.32179	8.13527	3.28382	4.83114	5.5717	6.14409	5.14093	5.42193	6.24342	4.98378	8.40745	6.60054
	9.32242	8.60101	6.85602	5.98581	7.81625	6.72699	5.42496	6.70072	8.03683	7.17103	6.09198	10.8257	4.98979	8.07328	3.3513	4.16181	5.53248	5.00004	4.88463	5.26273	6.35428	5.11672	8.08483	7.19729
	9.37874	8.75023	6.37132	5.56145	7.44225	6.91414	5.13412	6.59968	7.29149	8.1919	5.85836	10.7031	5.49755	8.08809	3.2395	3.67908	5.28958	4.16318	4.61768	5.13064	6.45107	5.15331	7.69163	6.891
	8.87469	8.45496	6.59175	5.79624	7.29265	6.94287	5.63381	6.55154	7.06765	8.56818	5.72326	10.0433	5.94268	7.99977	3.20143	3.91731	4.44305	4.3267	4.28179	4.49729	6.3448	4.79718	7.62256	6.29047
	8.32325	8.14546	7.04165	6.16022	7.51074	7.09081	6.33068	6.51284	7.68624	8.53879	5.83146	9.71855	5.99581		3.2003	4.88241	3.88293	5.59191	4.0366	3.69495	6.21665	4.33093	7.90414	5.94701
		7.95154		5.98301	7.41182	6.66807		6.28286	8.00899			9.61336			3.2028		4.34462	6.81993	4.42286	3.51651	6.23465	4.24534	8.40625	5.61171
		8.09904		5.60493	7.15595	6.25607		6.05373	7.68618			9.43578			3.08527		5.12942	6.81329	4.50846	3.81459		4.49387	8.70734	5.12984
		8.02559			6.05798	6.49322		5.86073							2.94096		5.63837		4.15607			4.68444		4.33644
					5.50562	6.94102		5.97343											3.84825			4.71586		3.84005
						7.28507													3.83093			4.82162		4.09009
																			4.15294
																			4.75145

## Sheet: RBF_LE
	Retinal Blood Flow (mL/mL/min)
Subject	1	2	3	4	5	6	7	8	9	10	11	12	101	*103	104	105	106	107	108	109	110	111	112	113
Group	C57BL/6J	C57BL/6J	C57BL/6J	C57BL/6J	C57BL/6J	C57BL/6J	C57BL/6J	C57BL/6J	C57BL/6J	C57BL/6J	C57BL/6J	C57BL/6J	DBA/2J	DBA/2J	DBA/2J	DBA/2J	DBA/2J	DBA/2J	DBA/2J	DBA/2J	DBA/2J	DBA/2J	DBA/2J	DBA/2J
																			1.18767
																			1.40468
																			1.30204
					2.35017	1.69536		1.73396							1.41227				1.32773					2.25009
		2.4802			2.10317	1.62719		2.28373							1.74914		1.03668		1.27065					2.27498
		2.68777			2.3318	1.18869		2.30329	0.695363			1.66703			1.74865		1.49632	0.979762	1.30645	0.867367			1.26319	2.12646
	1.46289	1.93787	1.75423	2.13585	2.44799	0.991254	1.30737	2.33578	0.68415	0.676766	2.13533	1.76466	0.386564		1.72818	1.20204	1.44296	-0.182212	1.24161	0.739779	1.77802		1.2445	1.90488
	1.58223	1.52387	1.38186	1.85913	2.42527	0.866673	1.57093	2.59709	0.754507	1.04514	2.50389	1.86242	0.210052		1.71291	0.972033	1.27443	-0.394029	0.729695	0.632377	3.0191		1.15668	1.55513
	1.74524	1.75479	1.32213	2.20425	2.64324	0.834884	1.81649	2.65376	1.19651	1.74872	2.47447	1.95547	0.308612		1.4694	1.94696	1.22217	0.247885	0.510095	0.422278	2.89453		1.0151	1.11119
	1.87182	1.96768	1.7635	3.22488	3.10716	0.911662	1.8779	2.55856	1.42027	2.03037	1.8589	2.06177	0.681014		1.35501	2.80267	0.977661	1.07545	0.666082	0.411472	2.30172		0.847161	0.873978
	2.16705	1.965	1.79655	3.44861	3.045	0.895238	1.91555	2.47072	1.3294	1.83147	1.58652	1.95444	1.51143	1.79339	1.48422	2.96235	0.73977	0.873297	0.772581	0.808698	1.89967		0.597473	0.953293
	2.75296	1.96751	1.41228	3.39381	2.18882	1.02008	2.09458	2.157	1.111	1.85763	1.55921	1.55804	2.25671	1.21708	1.87258	2.74936	0.715432	0.522892	1.11523	0.932231	1.66734		0.568326	1.52101
	2.88718	2.04167	1.8073	2.96786	1.58543	1.25755	2.08656	1.90818	1.47186	2.58462	1.55617	1.21903	2.473	1.57549	2.42145	2.82653	0.902774	0.792398	1.26765	0.673551	1.88554		0.920151	1.8472
	2.52952	2.12475	2.26121	2.46463	1.19139	1.60076	2.0768	2.23012	2.0429	3.14371	1.84228	1.17084	2.65921	1.8335	2.69607	2.95607	1.17972	1.00644	1.11356	0.664468	1.66897	1.65766	1.54721	1.79764
	2.47982	2.01952	2.00843	2.24861	1.34886	1.80107	2.05603	2.63569	1.98785	2.55562	1.97197	1.18145	2.40347	1.81579	3.02741	2.61497	1.19969	0.750014	0.949979	0.45574	1.01815	1.16696	1.85752	1.18822
	2.34807	2.06769	1.65288	2.23457	1.68053	1.56179	2.10204	2.58877	1.61227	1.78856	2.01279	1.0273	2.41821	1.70465	3.45918	2.34238	1.03315	0.0253968	1.02288	0.429757	0.947225	0.080148	1.77991	1.01192
	2.04446	2.41351	1.5675	2.16215	1.91205	1.13478	1.85676	2.34339	1.81272	1.55917	2.00061	0.915644	1.9379	1.71773	3.37517	2.02146	0.938203	-1.36834	1.18851	0.169369	1.29456	-0.335394	1.79953	1.57782
	1.79452	2.6196	1.68176	2.14155	1.67362	1.21495	1.76272	2.28645	2.40288	1.58928	2.09215	1.21621	0.508072	1.4497	2.63853	1.5142	1.13079	-1.24966	0.98401	-0.0344021	1.43586	0.601132	1.95031	1.97685
	1.94066	2.48583	1.74888	2.18332	1.53778	1.74838	1.99792	2.2067	2.32122	1.52123	2.25977	1.25639	0.240331	1.55924	1.83332	0.979827	1.43707	-0.132853	0.797013	0.430187	1.26524	1.4263	2.06152	1.67374
	2.76578	2.49756	2.00924	1.88011	1.43956	1.82989	2.08162	1.85207	1.77198	1.26868	1.85207	0.725422	0.897923	1.71527	1.47425	0.911975	1.99337	0.756709	1.14255	1.19038	1.26171	1.06867	1.86079	1.48214
	3.67204	2.2846	2.15545	1.552	1.78112	1.3028	1.87466	1.55984	1.86237	1.21032	1.67655	0.473879	1.62204	1.85157	1.13011	0.754114	2.36302	1.37813	1.46389	1.61449	1.40099	0.417937	1.34971	1.6928
	3.35797	1.97888	1.72553	2.04539	2.93666	0.980181	2.03173	2.13276	1.93371	1.4306	1.67697	0.669738	2.22894	1.87645	1.28812	0.383855	2.15994	0.881339	1.40646	1.66652	1.62954	-0.0872433	1.04886	2.11117
	2.83075	2.28119	1.33594	2.24626	3.202	1.47442	2.26453	2.55786	1.76487	1.49672	1.78278	0.824289	2.35339	2.24042	1.74897	0.765847	1.92687	0.428652	1.58161	1.67829	2.21157	-0.7249	1.05959	2.82272
	2.67801	2.51422	1.53241	2.51951	2.82578	1.69525	1.9186	2.0816	1.65757	1.32071	1.61326	1.19003	1.78067	2.59754	1.84199	1.2588	1.51529	0.439023	1.49764	1.41713	2.21334	-0.753268	1.14109	2.87691
	2.82724	2.25377	1.92751	2.96643	2.94307	1.62596	1.64599	1.49536	1.93641	1.32087	1.505	1.66576	1.37346	2.5775	1.5306	1.19072	0.952251	1.2021	1.20441	0.786876	1.95023	-0.763541	1.54259	2.26545
	3.01843	1.88323	1.80685	3.35175	2.97519	1.83908	1.99193	1.9675	2.36436	2.04855	1.61275	1.62871	1.59912	1.98608	1.63606	1.0103	0.84671	1.69233	1.32413	0.963782	1.92013	-0.506109	1.40562	1.66594
	3.08194	2.01609	1.54271	3.18972	2.92076	1.78293	2.39211	2.7701	2.33352	2.06107	1.79259	1.56414	2.07921	1.66536	1.90914	0.858696	0.844255	1.81947	1.56334	1.12318	1.84882	0.142812	1.14749	1.60268
	2.7543	2.12994	2.03261	3.35771	2.9974	2.14373	2.32861	2.85744	2.05445	1.77724	1.87955	1.6559	2.62868	1.73774	1.85969	1.25941	0.83122	2.2401	1.77576	0.846141	1.73006	0.474104	1.12024	2.34002
	2.38963	2.11165	2.86636	3.84051	2.59496	2.49494	2.06109	2.49534	2.07227	1.65292	1.94237	1.66582	2.69809	1.72343	1.90463	2.01945	0.830109	2.28589	2.18534	1.58229	1.50928	0.7783	1.41257	2.79196
	2.42475	1.8865	3.14768	4.04072	2.05488	2.75919	2.11798	2.01428	2.06467	1.98518	2.06962	1.47848	2.5012	1.51962	2.05637	2.65083	0.672882	1.76147	2.5053	2.28192	1.68926	1.86027	1.65467	2.69404
	2.70539	1.58956	3.35756	4.17494	1.74868	2.76151	1.82714	2.1649	1.89918	2.16826	2.03484	1.50587	2.17671	1.46312	1.88651	2.92717	0.658703	0.905083	2.34946	1.61127	2.60455	2.00353	1.66171	2.98654
	2.24311	1.41426	3.45444	4.66432	1.49291	2.6771	1.73192	2.41999	1.9164	2.19346	2.23548	1.91922	1.97604	1.93818	1.34147	3.34913	0.508853	0.371078	2.14915	0.942642	3.13677	1.17537	1.69022	3.43389
	1.03278	1.24407	3.26256	4.52021	1.38124	2.67876	2.49722	2.2731	2.01594	2.38807	2.24784	2.05073	2.58083	2.3851	1.12399	3.72025	-0.0137093	0.304393	1.73803	1.0675	2.97709	0.86806	1.82974	3.33232
	0.659404	1.21083	3.19704	4.23279	1.81056	2.47334	3.09134	2.12924	1.81473	2.43582	1.90456	2.14885	3.21104	2.31107	1.50867	3.96215	-0.378692	0.591962	1.76562	1.12039	2.80283	0.566202	1.89152	3.29623
	0.853299	1.53525	2.75819	4.53559	2.27373	2.12251	3.05821	2.18597	1.45221	2.3053	2.10692	2.34263	3.12001	2.26313	1.92944	3.65097	-0.0463069	1.06357	1.74403	1.41293	2.74848	0.59064	1.91414	2.86001
	0.829794	1.85036	2.39308	4.63833	2.53931	2.01555	2.65018	1.92003	1.49289	2.20344	2.62133	2.47861	3.01411	2.39115	2.58886	3.70389	0.59361	1.49154	1.65916	1.92771	2.53728	0.708521	1.8897	2.29494
	1.15773	1.74257	2.63502	3.91983	3.14875	2.04182	2.72752	1.98293	1.35738	2.10026	2.90541	2.4468	3.00434	2.08807	2.63078	3.45203	0.940124	1.58295	1.80759	2.04909	2.35736	0.826034	1.80856	2.08546
	1.97446	1.57679	2.77105	3.3222	3.36955	1.7117	3.02597	2.1662	0.930681	1.82121	2.78794	2.18057	2.80251	2.51639	2.22314	2.76442	0.875457	1.74323	1.79914	1.49354	2.24864	0.588455	1.71711	1.97378
	2.06851	1.19295	3.02121	3.35442	3.40382	1.46925	2.70137	2.11195	0.856341	1.85777	2.43842	1.51309	1.58415	2.81508	1.84931	2.78431	0.624557	1.72334	1.53922	0.376721	1.90661	0.232617	1.82146	1.55779
	2.14475	1.12723	2.78522	3.85412	3.62701	1.79642	2.38572	1.81552	1.1216	1.88495	2.1558	0.927538	0.851939	2.89804	1.90426	2.49981	0.0749159	2.01844	1.54699	-0.0694718	1.23723	-0.118818	2.11612	1.07639
	2.34044	1.20945	2.30095	3.9837	2.80718	1.731	2.58597	1.56951	1.1649	1.71187	2.39471	0.813006	1.07841	2.92767	1.81799	2.29641	-0.439271	1.79288	1.32327	1.28547	0.757482	-0.570622	2.26752	1.2292
	2.54149	1.12631	1.72559	3.63229	1.88017	1.53965	2.86224	1.48564	1.37367	1.64118	2.55174	1.36947	1.30321	3.09407	1.70317	3.15763	-0.455266	1.38743	1.31312	2.69168	0.304412	-0.389228	2.21293	1.18746
	1.93095	0.948189	1.46579	4.16205	1.6416	1.56419	2.39225	1.83687	1.78796	1.71742	2.27889	1.69124	1.132	3.22737	1.65436	2.97208	0.151367	1.21102	1.66582	2.68714	0.211252	0.100701	1.9995	1.04817
	1.4486	1.33553	1.89864	4.57664	1.77072	1.74362	1.80916	2.01429	2.01076	1.30889	2.07163	1.72983	1.06285	3.23205	1.60553	1.77407	0.68627	1.32472	1.68803	2.37161	0.807521	0.739891	1.86929	1.44851
	1.78599	1.62696	1.62776	3.71023	2.06087	1.78761	1.86819	2.00885	1.60616	1.15924	2.36035	1.62802	1.25259	2.98734	1.64446	1.45423	0.817481	1.47449	1.52638	2.39507	0.937503	1.14039	1.90541	2.01116
	2.11625	1.80074	1.84978	2.40876	2.25262	1.99036	1.68373	2.47168	1.08875	1.3168	2.42764	1.32904	1.8606	2.59314	1.65315	1.69908	0.838829	2.60948	1.53806	2.21844	1.05576	1.28366	1.93262	2.10092
	2.12891	2.08626	2.21312	2.28683	2.76579	2.11927	1.97089	2.82985	1.0746	1.16055	2.26187	1.54713	1.78994	2.46521	1.81558	1.52532	0.966329	2.35992	1.73437	1.66973	1.47119	1.12061	2.03601	2.0018
	2.12536	2.36998	2.15411	2.92543	3.3009	1.81549	2.47946	2.22787	1.30216	0.609329	2.89188	1.81505	1.69788	2.38179	2.10697	1.21568	0.930032	1.27072	1.73463	1.45348	2.25634	1.28811	1.85633	2.14465
	2.22717	3.02772	2.09066	3.28556	3.81618	1.95238	2.46833	1.66848	1.08151	0.505814	3.88192	1.88529	1.68669	2.1903	2.16463	1.43029	1.16458	1.11706	1.99864	1.80186	2.14387	1.48801	1.63755	1.81492
	2.58787	3.3748	2.34678	3.54353	4.3516	2.46079	2.564	1.80556	0.770017	0.981967	3.81217	1.68603	1.10866	2.12905	1.98687	2.07412	1.81591	1.76007	2.44585	2.6642	1.34417	0.914246	1.46084	0.957898
	3.0674	2.73187	2.55275	3.26216	4.07649	2.53177	2.84654	2.09305	1.48473	1.48519	2.90922	1.64782	0.750321	1.99609	1.86831	2.00415	2.57964	3.02554	2.2833	3.48472	1.34221	0.566586	1.33703	0.751612
	3.12311	2.33329	2.03493	2.54292	3.14812	2.13524	2.29401	1.6918	1.82293	1.82328	2.20872	2.03578	1.40371	2.60377	1.98809	1.63103	2.3964	3.46598	1.30232	3.8734	1.59287	0.260436	1.2991	1.21861
	2.66332	2.44217	1.61248	2.29405	2.28079	1.74002	1.62742	1.09169	1.49119	1.91323	2.03995	2.33999	2.50238	3.53126	1.85876	1.61486	2.05096	2.25308	0.354385	3.30434	2.24137	0.180343	0.908028	1.4627
	2.13677	2.43278	1.5366	2.61433	1.57974	1.75644	1.85434	1.02948	1.3717	1.9251	2.21717	2.28712	2.99775	3.78844	1.44586	1.40183	1.71164	1.66258		2.60183	2.77804	0.913796	0.300009	1.20698
	1.98979	2.10834	1.62195	2.60682	0.815276	2.06945	2.01382	1.5498	1.76076	1.87895	2.67427	2.00259	2.84116	3.56538	0.883296	0.96789	2.12299	1.95883		2.08923	2.12777		0.194166	0.767306
	1.47236	2.11661	1.78316	2.18776	0.809816	2.67252	1.96106	2.03876	2.02924	2.17044	2.64851	1.92831	2.29692	2.97164	0.617779	1.59067	2.95473	2.42619		2.08355	1.9834		0.203737	0.501853
	1.33613	2.21166	1.91309	1.41575			1.96956		1.82797	2.33313	2.23624	2.11444	2.19807	2.40087		2.2954	2.83583	3.26872		1.97556	2.63138		0.522559
	1.53728		2.77215	1.52912			2.39852		1.52014	2.06848	2.1835	2.04604	2.6683	2.69323		2.50343		2.07745		1.79873	2.64651		1.09467
	1.72747		2.2861	1.67366			3.00268			2.02364	2.21676		2.06969	3.50407		2.05419					1.83651
														3.7352
														2.89003
														1.37813
	2.19425		0.826572				1.43117			1.29557	2.07827		1.09119	1.47181		2.2776
	2.14911		1.17913				1.30928			1.48286	2.05615		0.7316	1.73416		3.02124					1.96252
	2.01905		1.74643	1.65194			1.2979		1.1843	1.70581	1.62847	2.40428	1.62306	1.83563		2.24183		3.52477		2.18069	1.4217		1.64686
	2.01162	1.70801	1.44879	1.13106			1.0493		0.84635	1.48815	1.17367	2.16914	2.32826	1.7862	2.04237	1.49342	1.66806	2.63045		1.88031	1.08604		2.139
	2.04778	1.21457	1.12963	0.919196	1.18677		0.422672	3.30799	0.894531	1.08255	0.676199	1.92186	1.86108	1.97721	1.85399	1.38177	1.78681	3.06864		1.63422	1.13219		2.21606
	2.23547	1.0645	0.769781	0.917751	1.40461	1.96195	0.459764	3.06855	1.29863	1.19269	0.659034	1.66625	1.6427	2.20831	1.73892	0.793321	2.04343	3.57206		1.38023	1.55731	1.13216	1.65715	2.14428
	2.44472	1.05106	0.765586	0.487425	1.1979	1.90141	1.0795	2.64733	1.95651	1.49553	1.00788	1.46812	1.40256	2.08351	1.78237	0.526353	1.98965	2.99936		1.33283	1.73509	1.88114	1.27726	1.65711
	2.58205	1.28571	0.812547	0.517607	1.33604	1.33115	0.863117	2.18047	2.10364	1.98279	1.3519	1.57639	1.46368	1.73918	2.41734	0.289152	1.53074	1.82892	0.619731	1.14021	1.57203	2.82769	1.40705	1.29867
	2.49169	1.36025	1.16932	0.746725	1.91584	0.758922	0.587874	1.78003	1.70365	2.24981	1.37587	1.87636	1.69024	1.66394	2.7423	0.125294	1.25093	1.32193	0.493004	1.13987	1.25911	3.29124	1.58038	1.19974
	2.226	0.941963	1.5672	0.910344	2.08468	0.5088	0.67992	1.41372	1.34156	1.60903	1.14301	1.54371	1.88867	1.68579	2.11222	0.570473	1.06361	1.33146	0.977786	1.53405	0.763276	2.90507	1.95367	1.36316
	1.52176	0.49087	1.60523	0.855092	2.04628	0.468955	0.544816	1.17858	1.39261	0.954402	0.921449	0.918656	1.61519	1.80965	1.56986	0.958574	1.11115	1.42198	0.940685	1.95986	0.702987	2.27512	1.80725	1.40516
	0.94956	0.547222	1.41356	0.592174	1.79569	0.807376	0.228263	1.37021	1.41236	0.880518	0.831452	0.460558	1.50303	2.07045	1.25616	1.04246	1.53413	2.00412	0.947538	2.25006	1.10522	1.58784	1.07207	1.18406
	1.22848	1.08371	1.30936	1.08477	1.54537	1.18107	0.529348	1.644	1.26032	0.995139	0.999793	0.122476	1.14806	2.04906	1.40431	0.8195	1.29122	2.77947	0.496491	2.48904	1.64151	1.13968	0.533048	0.936972
	1.69681	1.39468	1.10407	1.15778	1.56962	1.09402	0.886721	1.46976	0.901108	1.58581	1.14406	0.300955	1.11019	1.94679	2.22029	0.499622	0.587117	2.24429	0.364958	2.15842	2.35421	1.48187	0.36962	1.01803
	1.61272	1.4146	0.870873	0.724283	1.81174	0.711495	0.989721	1.09665	0.375257	2.10461	0.998088	0.774237	1.54301	1.59951	2.62004	-0.0485595	0.152706	1.34699	0.125622	1.39589	2.15901	2.15193	0.271966	1.19889
	1.40221	1.42634	0.823834	0.102693	1.51994	1.0251	0.883338	0.680757	0.328701	1.75016	1.09399	0.981751	1.68064	1.09374	2.29731	-0.198102	0.070912	1.65962	0.563011	0.909873	0.365623	2.29672	0.269328	1.32063
	1.44371	1.34526	0.868411	-0.92176	0.915002	1.75478	0.363704	0.291133	0.825542	1.19426	1.45252	1.09352	1.59557	0.963767	1.81562	0.163911	0.377089	1.95777	0.796819	1.1155	-0.714406	2.15711	0.368666	1.63126
	1.9696	1.61448	0.782976	-0.754665	0.568084	2.26492	-0.205385	0.450668	1.10258	1.13474	1.47076	1.13548	1.61351	1.36883	0.999243	0.737253	1.16375	1.92496	1.07223	1.45985	-0.962508	1.79207	0.353907	1.97649
	2.19533	1.88983	0.805408	0.47918	0.664307	2.74459	-0.0646241	0.824799	1.07192	1.18454	1.01116	1.08499	1.02887	1.38049	0.421751	1.44113	1.27581	1.61417	1.08314	1.26983	-0.46039	1.31842	0.408273	2.29951
	2.04035	1.49548	0.706766	1.26511	1.20435	2.38331	0.632865	0.868147	0.955245	1.14536	0.658929	0.905301	-0.0417976	1.09198	0.352434	1.73216	0.543469	1.13187	0.695956	0.863022	0.939998	1.20303	0.919771	2.35515
	1.8355	0.612132	0.39309	1.85701	1.49477	1.72475	0.707654	0.799451	0.752536	1.12666	0.570492	0.722879	-0.0601507	0.88967	0.599828	2.01827	0.0493333	0.265801	0.572123	-0.0310205	1.43172	1.16726	1.13159	2.15508
	1.6426	0.0704879	0.107795	1.33545	1.17521	1.50017	0.154406	0.926496	0.66851	1.10943	0.545788	0.597575	0.226534	0.674748	1.23724	1.58528	-0.0802658	0.000724084	0.521556	-0.494036	0.95373	0.942353	0.921878	1.35751
	1.51145	-0.163937	0.441553	0.232638	0.794757	1.02816	-0.0887181	1.03225	0.757286	1.15793	0.936845	0.544871	0.840771	0.481842	1.49604	1.34902	0.128873	-0.0216788	0.552181	-0.0900695	0.911405	0.683616	0.784648	0.882686
	1.33807	0.144728	1.00053	-0.158917	0.192334	1.01948	-0.153514	1.05075	0.922719	1.49238	0.981587	0.544857	1.24363	0.0820681	1.18219	1.1301	0.817495	0.362637	1.15047	0.460962	1.46344	0.827015	0.720177	1.1531
	1.12321	1.07498	1.33963	-0.295334	-0.203675	1.23048	0.123509	0.948339	1.17902	1.7334	0.496235	0.608282	1.64893	-0.193647	0.804202	1.08484	1.22885	0.660296	0.57751	0.698311	1.72059	1.3317	0.718246	1.5775
	0.660605	1.3292	1.43004	-0.22496	-0.280013	1.61743	0.7186	0.884956	1.36591	1.36762	0.0236666	0.85014	1.53056	-0.0496997	0.841424	1.60545	1.21945	0.306232	0.356295	0.719071	1.54348	1.98552	0.827789	1.97418
	0.481079	1.15838	0.949353	-0.315588	0.364168	2.02287	0.673693	0.865406	1.33308	0.679795	-0.20473	1.2717	0.889981	0.29861	1.23415	2.39604	1.06803	-0.360423	0.851841	0.261471	1.07979	2.60401	0.669582	2.23011
	0.799714	0.984556	0.444502	-0.200818	0.823432	1.96608	0.646797	0.820219	1.26744	0.969776	-0.0200772	1.58155	0.371479	0.681334	1.07264	3.24413	0.526504	-0.557904	0.807952	-0.189058	0.0354569	1.91546	0.121544	2.08316
	1.13193	0.785991	0.137728	0.582632	1.77441	1.85781	0.671898	0.865108	0.968417	1.49334	0.623039	1.69182	0.194102	1.02214	0.954611	3.59561	0.2305	0.0150773	0.664795	0.0377273	0.0830161	0.944077	-0.213212	1.79418
	1.38063	0.629983	-0.20622	0.534115	1.66259	1.58706	0.3719	0.691294	0.872985	1.80212	1.17597	1.62359	-0.00484274	1.04634	1.02893	2.73706	0.202046	1.03827	0.702046	0.467887	1.16206	0.94331	-0.178729	2.10727
	1.55018	0.529616	-0.439457	0.745195	0.991023	1.45331	-0.0251094	0.51312	0.871484	1.88708	1.36239	1.17094	-0.178966	0.900932	1.23343	1.52429	0.231789	0.6387	0.742727	0.706019	1.76247	1.39618	0.0666566	2.41357
	1.58051	0.535118	-0.309129	0.757006	0.552643	1.34207	0.259584	0.777935	0.82898	1.29177	1.07036	0.832802	-0.165164	0.74457	1.25193	0.840915	0.567636	0.211148	0.782032	0.912525	1.90719	2.03712	0.459824	1.78627
	1.57193	0.624321	0.227683	0.87936	0.530217	1.16431	0.792136	0.935138	1.12779	0.642567	0.803831	0.695897	0.158994	0.776329	1.07075	0.345311	0.871555	-0.296502	0.765964	0.936386	1.52485	2.4862	0.738164	1.24417
	1.36206	0.675682	0.970359	1.03605	0.86652	0.780206	1.16411	0.811654	1.33086	1.1333	1.03227	0.666953	0.542369	0.94424	0.925683	0.173025	0.958772	-0.212399	0.603681	1.00195	1.06358	1.75154	0.857667	0.640628
	1.07911	0.664726	1.42106	1.24806	1.49784	0.358602	1.25082	0.469034	1.55719	1.87735	1.19949	0.665361	0.800418	1.1447	0.828192	0.505762	1.04383	0.483857	0.352037	1.02149	1.09623	1.08039	0.875096	0.119834
	0.28263	0.540022	1.60392	1.06616	1.63456	0.407977	0.481763	0.212543	1.55593	2.24352	0.946678	0.726014	0.843306	1.30019	0.685811	0.865378	0.823015	0.50746	0.16828	0.90601	2.10205	0.996797	0.844268	0.517425
	-0.287951	0.576068	1.56386	0.674903	1.19579	0.804547	0.337396	0.303365	1.32749	2.37133	1.07108	0.728635	0.0373795	1.14546	0.54479	1.3722	0.539376	0.568064	0.244669	0.454201	2.14745	1.11035	0.732906	1.40118
	-0.073302	0.924679	1.10932	0.462922	0.74308	1.11295	0.242073	0.311932	1.09107	2.1492	0.697721	0.803598	-0.567242	1.08491	0.317039	1.75672	0.318927	0.860362	0.821637	-0.221673	1.60252	1.17146	0.631258	1.5083
	0.433486	1.1774	0.866446	0.631311	0.727816	1.47385	0.499571	0.297331	0.79945	1.74228	0.367354	0.851015	-0.618737	1.04853	0.00137371	2.12859	0.357871	1.44565	0.997504	-0.853578	0.975449	1.21792	0.565943	1.21923
	0.778286	1.10835	0.845852	0.683029	0.866256	1.46826	0.658683	0.570461	0.431551	1.62714	0.64461	0.941613	0.114762	1.20923	0.077877	2.31406	0.863539	1.74111	0.798077	-0.811223	0.231295	0.636413	0.491732	0.946944
	0.977297	0.754318	0.974208	0.595626	0.941798	1.14943	0.34905	0.895591	0.2019	1.91481	0.664968	0.886269	-0.0318658	1.30974	0.258315	2.44795	1.32648	1.9009	0.58611	-0.609802	-0.331451	0.144393	0.433862	0.51306
	0.980559	0.447651	1.04502	0.643108	0.896997	1.10472	0.428167	1.24078	0.185465	1.69075	0.440633	0.646846	0.978165	0.788024	0.324002	2.09563	1.28996	1.01445	0.571864	-0.255769	0.134152	0.366348	0.387105	0.649241
	0.932996	0.284368	0.818793	0.754205	0.513411	1.30974	0.65372	1.55677	0.558296	1.22717	0.293857	0.219351	1.30755	0.045457	0.288606	1.79568	1.03597	-0.349467	0.82274	-0.0558144	0.670385	0.570855	0.532894	1.2067
	1.03657	0.454546	0.360097	0.712224	0.76142	1.43668	0.58705	1.19543	1.12203	1.05907	0.0657116	0.143803	0.706099	-0.111126	0.166401	0.785553	0.519511	-0.639686	0.981859	-0.0356414	1.09161	0.879818	0.451498	1.4224
	1.17769	0.775942	0.109041	0.770343	1.18387	1.38421	0.76411	0.480414	1.49555	0.786808	0.0321281	0.650414	0.996127	0.0575451	-0.0958368	-0.317897	0.278495	-0.100723	1.09355	-0.246	1.22825	0.788914	0.431178	1.67831
	0.917241	0.991407	0.0320868	0.731948	1.21295	1.16053	0.796239	0.467216	1.69108	0.717282	0.497062	1.30713	1.26216	0.257964	-0.221032	-0.198062	0.93371	1.13162	1.06656	-0.447068	1.04546	0.394855	0.305891	1.9056
	0.358932	1.06591	0.246986	0.636934	1.14947	0.80603	0.535272	1.01109	1.52472	1.08611	1.02388	1.48572	1.50591	0.389394	-0.171177	0.471179	1.62441	2.08553	1.15425	-0.56302	0.868514	-0.256459	0.271114	1.86397
	0.199786	0.918529	0.885059	0.539151	1.23612	0.616281	0.406999	1.48555	1.19865	1.00967	0.961252	1.42168	1.21402	0.394959	-0.161935	0.879265	1.76271	1.79584	1.16666	-0.561661	0.739114	-0.305189	0.387545	1.17002
	0.453039	0.758153	1.37494	0.196033	0.377196	0.519579	0.304738	1.89251	0.883735	0.575673	0.718531	1.41619	1.14204	0.597188	-0.0419492	1.49559	1.5986	0.723762	0.750028	-0.280723	0.665603	0.0177091	0.304055	0.787868
	0.918841	0.736956	1.29845	-0.110684	0.108512	0.617933	0.200181	1.8445	0.656368	0.232151	0.467027	1.49778	1.51556	0.375508	0.186751	1.68884	1.12204	0.343057	0.326276	0.0550044	0.836524	0.390202	0.0103505	1.00341
	1.59011	0.846409	1.03675	-0.211779	-0.0625159	0.55738	0.160555	1.39649	0.691535	-0.0664234	0.370398	1.46049	2.27678	0.192016	0.23398	1.64144	0.752312	0.400165	0.111906	0.607148	0.853817	0.695975	-0.0970522	1.39172
	1.9442	0.818086	1.01531	-0.376966	0.0689952	0.480552	0.252807	1.20605	0.730137	0.0311634	0.501847	1.43875	2.54481	0.157942	-0.0437851	1.466	1.02635	0.390522	0.0693719	1.04629	0.500256	0.562146	0.155868	2.03619
	1.91692	0.703172	1.06776	-0.0404369	0.366116	0.395442	0.416226	1.24672	0.631909	0.349868	0.715241	1.31679	2.00245		-0.115236	1.32626	1.37451	0.00722234	0.0802427	1.18585	0.689288	-0.152025	0.47223	2.15426
		0.601304		0.791469	0.599521	0.553407		1.11659	0.790915			1.31376			0.0988422		1.28126	-0.166008	0.211129	1.14348	0.705088	-0.158447	0.735224	1.0507
		0.403325		0.677484	0.630346	0.981738		1.03984	0.812233			1.08704			0.343884		0.708113	0.260298	0.235666	1.07019		0.0160975	0.789835	0.384446
		0.182187			0.450008	1.28506		1.13831							0.675449		0.427018		0.356197			0.386729		0.462195
					-0.0498164	1.32448		0.937387											0.0729733			0.423804		0.608245
						1.26958													0.00856112			0.341087		1.57803
																			0.004359
																			0.39418

## Sheet: Dist_RE
	Distance (um)
Subject	1	2	3	4	5	6	7	8	9	10	11	12	*101	103	104	105	106	107	108	109	110	111	112	113
Group	C57BL/6J	C57BL/6J	C57BL/6J	C57BL/6J	C57BL/6J	C57BL/6J	C57BL/6J	C57BL/6J	C57BL/6J	C57BL/6J	C57BL/6J	C57BL/6J	DBA/2J	DBA/2J	DBA/2J	DBA/2J	DBA/2J	DBA/2J	DBA/2J	DBA/2J	DBA/2J	DBA/2J	DBA/2J	DBA/2J
				-1385.42
				-1364.58																-1375
				-1343.75				-1354.17		-1364.58					-1364.58					-1354.17
			-1322.92	-1322.92	-1333.33	-1333.33		-1333.33		-1343.75	-1322.92				-1343.75					-1333.33
	-1312.5		-1302.08	-1302.08	-1312.5	-1312.5	-1312.5	-1312.5		-1322.92	-1302.08		-1312.5	-1312.5	-1322.92			-1312.5	-1312.5	-1312.5	-1312.5		-1312.5	-1312.5
	-1291.67		-1281.25	-1281.25	-1291.67	-1291.67	-1291.67	-1291.67	-1281.25	-1302.08	-1281.25		-1291.67	-1291.67	-1302.08			-1291.67	-1291.67	-1291.67	-1291.67	-1302.08	-1291.67	-1291.67
	-1270.83		-1260.42	-1260.42	-1270.83	-1270.83	-1270.83	-1270.83	-1260.42	-1281.25	-1260.42	-1270.83	-1270.83	-1270.83	-1281.25	-1260.42		-1270.83	-1270.83	-1270.83	-1270.83	-1281.25	-1270.83	-1270.83
	-1250		-1239.58	-1239.58	-1250	-1250	-1250	-1250	-1239.58	-1260.42	-1239.58	-1250	-1250	-1250	-1260.42	-1239.58	-1250	-1250	-1250	-1250	-1250	-1260.42	-1250	-1250
	-1229.17		-1218.75	-1218.75	-1229.17	-1229.17	-1229.17	-1229.17	-1218.75	-1239.58	-1218.75	-1229.17	-1229.17	-1229.17	-1239.58	-1218.75	-1229.17	-1229.17	-1229.17	-1229.17	-1229.17	-1239.58	-1229.17	-1229.17
	-1208.33	-1197.92	-1197.92	-1197.92	-1208.33	-1208.33	-1208.33	-1208.33	-1197.92	-1218.75	-1197.92	-1208.33	-1208.33	-1208.33	-1218.75	-1197.92	-1208.33	-1208.33	-1208.33	-1208.33	-1208.33	-1218.75	-1208.33	-1208.33
	-1187.5	-1177.08	-1177.08	-1177.08	-1187.5	-1187.5	-1187.5	-1187.5	-1177.08	-1197.92	-1177.08	-1187.5	-1187.5	-1187.5	-1197.92	-1177.08	-1187.5	-1187.5	-1187.5	-1187.5	-1187.5	-1197.92	-1187.5	-1187.5
	-1166.67	-1156.25	-1156.25	-1156.25	-1166.67	-1166.67	-1166.67	-1166.67	-1156.25	-1177.08	-1156.25	-1166.67	-1166.67	-1166.67	-1177.08	-1156.25	-1166.67	-1166.67	-1166.67	-1166.67	-1166.67	-1177.08	-1166.67	-1166.67
	-1145.83	-1135.42	-1135.42	-1135.42	-1145.83	-1145.83	-1145.83	-1145.83	-1135.42	-1156.25	-1135.42	-1145.83	-1145.83	-1145.83	-1156.25	-1135.42	-1145.83	-1145.83	-1145.83	-1145.83	-1145.83	-1156.25	-1145.83	-1145.83
	-1125	-1114.58	-1114.58	-1114.58	-1125	-1125	-1125	-1125	-1114.58	-1135.42	-1114.58	-1125	-1125	-1125	-1135.42	-1114.58	-1125	-1125	-1125	-1125	-1125	-1135.42	-1125	-1125
	-1104.17	-1093.75	-1093.75	-1093.75	-1104.17	-1104.17	-1104.17	-1104.17	-1093.75	-1114.58	-1093.75	-1104.17	-1104.17	-1104.17	-1114.58	-1093.75	-1104.17	-1104.17	-1104.17	-1104.17	-1104.17	-1114.58	-1104.17	-1104.17
	-1083.33	-1072.92	-1072.92	-1072.92	-1083.33	-1083.33	-1083.33	-1083.33	-1072.92	-1093.75	-1072.92	-1083.33	-1083.33	-1083.33	-1093.75	-1072.92	-1083.33	-1083.33	-1083.33	-1083.33	-1083.33	-1093.75	-1083.33	-1083.33
	-1062.5	-1052.08	-1052.08	-1052.08	-1062.5	-1062.5	-1062.5	-1062.5	-1052.08	-1072.92	-1052.08	-1062.5	-1062.5	-1062.5	-1072.92	-1052.08	-1062.5	-1062.5	-1062.5	-1062.5	-1062.5	-1072.92	-1062.5	-1062.5
	-1041.67	-1031.25	-1031.25	-1031.25	-1041.67	-1041.67	-1041.67	-1041.67	-1031.25	-1052.08	-1031.25	-1041.67	-1041.67	-1041.67	-1052.08	-1031.25	-1041.67	-1041.67	-1041.67	-1041.67	-1041.67	-1052.08	-1041.67	-1041.67
	-1020.83	-1010.42	-1010.42	-1010.42	-1020.83	-1020.83	-1020.83	-1020.83	-1010.42	-1031.25	-1010.42	-1020.83	-1020.83	-1020.83	-1031.25	-1010.42	-1020.83	-1020.83	-1020.83	-1020.83	-1020.83	-1031.25	-1020.83	-1020.83
	-1000	-989.583	-989.583	-989.583	-1000	-1000	-1000	-1000	-989.583	-1010.42	-989.583	-1000	-1000	-1000	-1010.42	-989.583	-1000	-1000	-1000	-1000	-1000	-1010.42	-1000	-1000
	-979.167	-968.75	-968.75	-968.75	-979.167	-979.167	-979.167	-979.167	-968.75	-989.583	-968.75	-979.167	-979.167	-979.167	-989.583	-968.75	-979.167	-979.167	-979.167	-979.167	-979.167	-989.583	-979.167	-979.167
	-958.333	-947.917	-947.917	-947.917	-958.333	-958.333	-958.333	-958.333	-947.917	-968.75	-947.917	-958.333	-958.333	-958.333	-968.75	-947.917	-958.333	-958.333	-958.333	-958.333	-958.333	-968.75	-958.333	-958.333
	-937.5	-927.083	-927.083	-927.083	-937.5	-937.5	-937.5	-937.5	-927.083	-947.917	-927.083	-937.5	-937.5	-937.5	-947.917	-927.083	-937.5	-937.5	-937.5	-937.5	-937.5	-947.917	-937.5	-937.5
	-916.667	-906.25	-906.25	-906.25	-916.667	-916.667	-916.667	-916.667	-906.25	-927.083	-906.25	-916.667	-916.667	-916.667	-927.083	-906.25	-916.667	-916.667	-916.667	-916.667	-916.667	-927.083	-916.667	-916.667
	-895.833	-885.417	-885.417	-885.417	-895.833	-895.833	-895.833	-895.833	-885.417	-906.25	-885.417	-895.833	-895.833	-895.833	-906.25	-885.417	-895.833	-895.833	-895.833	-895.833	-895.833	-906.25	-895.833	-895.833
	-875	-864.583	-864.583	-864.583	-875	-875	-875	-875	-864.583	-885.417	-864.583	-875	-875	-875	-885.417	-864.583	-875	-875	-875	-875	-875	-885.417	-875	-875
	-854.167	-843.75	-843.75	-843.75	-854.167	-854.167	-854.167	-854.167	-843.75	-864.583	-843.75	-854.167	-854.167	-854.167	-864.583	-843.75	-854.167	-854.167	-854.167	-854.167	-854.167	-864.583	-854.167	-854.167
	-833.333	-822.917	-822.917	-822.917	-833.333	-833.333	-833.333	-833.333	-822.917	-843.75	-822.917	-833.333	-833.333	-833.333	-843.75	-822.917	-833.333	-833.333	-833.333	-833.333	-833.333	-843.75	-833.333	-833.333
	-812.5	-802.083	-802.083	-802.083	-812.5	-812.5	-812.5	-812.5	-802.083	-822.917	-802.083	-812.5	-812.5	-812.5	-822.917	-802.083	-812.5	-812.5	-812.5	-812.5	-812.5	-822.917	-812.5	-812.5
	-791.667	-781.25	-781.25	-781.25	-791.667	-791.667	-791.667	-791.667	-781.25	-802.083	-781.25	-791.667	-791.667	-791.667	-802.083	-781.25	-791.667	-791.667	-791.667	-791.667	-791.667	-802.083	-791.667	-791.667
	-770.833	-760.417	-760.417	-760.417	-770.833	-770.833	-770.833	-770.833	-760.417	-781.25	-760.417	-770.833	-770.833	-770.833	-781.25	-760.417	-770.833	-770.833	-770.833	-770.833	-770.833	-781.25	-770.833	-770.833
	-750	-739.583	-739.583	-739.583	-750	-750	-750	-750	-739.583	-760.417	-739.583	-750	-750	-750	-760.417	-739.583	-750	-750	-750	-750	-750	-760.417	-750	-750
	-729.167	-718.75	-718.75	-718.75	-729.167	-729.167	-729.167	-729.167	-718.75	-739.583	-718.75	-729.167	-729.167	-729.167	-739.583	-718.75	-729.167	-729.167	-729.167	-729.167	-729.167	-739.583	-729.167	-729.167
	-708.333	-697.917	-697.917	-697.917	-708.333	-708.333	-708.333	-708.333	-697.917	-718.75	-697.917	-708.333	-708.333	-708.333	-718.75	-697.917	-708.333	-708.333	-708.333	-708.333	-708.333	-718.75	-708.333	-708.333
	-687.5	-677.083	-677.083	-677.083	-687.5	-687.5	-687.5	-687.5	-677.083	-697.917	-677.083	-687.5	-687.5	-687.5	-697.917	-677.083	-687.5	-687.5	-687.5	-687.5	-687.5	-697.917	-687.5	-687.5
	-666.667	-656.25	-656.25	-656.25	-666.667	-666.667	-666.667	-666.667	-656.25	-677.083	-656.25	-666.667	-666.667	-666.667		-656.25	-666.667	-666.667	-666.667	-666.667	-666.667	-677.083	-666.667	-666.667
	-645.833	-635.417	-635.417	-635.417	-645.833	-645.833	-645.833	-645.833	-635.417	-656.25	-635.417	-645.833	-645.833	-645.833		-635.417	-645.833	-645.833	-645.833	-645.833	-645.833	-656.25	-645.833	-645.833
	-625	-614.583	-614.583	-614.583	-625	-625	-625	-625	-614.583	-635.417	-614.583	-625	-625	-625		-614.583	-625	-625	-625	-625	-625	-635.417	-625	-625
	-604.167	-593.75	-593.75	-593.75	-604.167	-604.167	-604.167	-604.167	-593.75	-614.583	-593.75	-604.167	-604.167	-604.167		-593.75	-604.167	-604.167	-604.167	-604.167	-604.167	-614.583	-604.167	-604.167
	-583.333	-572.917	-572.917	-572.917	-583.333	-583.333	-583.333	-583.333	-572.917	-593.75	-572.917	-583.333	-583.333	-583.333		-572.917	-583.333	-583.333	-583.333	-583.333	-583.333	-593.75	-583.333	-583.333
	-562.5	-552.083	-552.083	-552.083	-562.5	-562.5	-562.5	-562.5	-552.083	-572.917	-552.083	-562.5	-562.5	-562.5		-552.083	-562.5	-562.5	-562.5	-562.5	-562.5	-572.917	-562.5	-562.5
	-541.667	-531.25	-531.25	-531.25	-541.667	-541.667	-541.667	-541.667	-531.25	-552.083	-531.25	-541.667	-541.667	-541.667		-531.25	-541.667	-541.667	-541.667	-541.667	-541.667	-552.083	-541.667	-541.667
	-520.833	-510.417	-510.417	-510.417	-520.833	-520.833	-520.833	-520.833	-510.417	-531.25	-510.417	-520.833	-520.833	-520.833		-510.417	-520.833	-520.833	-520.833	-520.833	-520.833	-531.25	-520.833	-520.833
	-500	-489.583	-489.583	-489.583	-500	-500	-500	-500	-489.583	-510.417	-489.583	-500	-500	-500		-489.583	-500	-500	-500	-500	-500	-510.417	-500	-500
	-479.167	-468.75	-468.75	-468.75	-479.167	-479.167	-479.167	-479.167	-468.75	-489.583	-468.75	-479.167	-479.167	-479.167		-468.75	-479.167	-479.167	-479.167	-479.167	-479.167	-489.583	-479.167	-479.167
	-458.333	-447.917	-447.917	-447.917	-458.333	-458.333	-458.333	-458.333	-447.917	-468.75	-447.917	-458.333	-458.333	-458.333		-447.917	-458.333	-458.333	-458.333	-458.333	-458.333	-468.75	-458.333	-458.333
	-437.5	-427.083	-427.083	-427.083	-437.5	-437.5	-437.5	-437.5	-427.083	-447.917	-427.083	-437.5	-437.5	-437.5		-427.083	-437.5	-437.5	-437.5	-437.5	-437.5	-447.917	-437.5	-437.5
	-416.667	-406.25	-406.25	-406.25	-416.667	-416.667	-416.667	-416.667	-406.25	-427.083	-406.25	-416.667	-416.667	-416.667		-406.25	-416.667	-416.667	-416.667	-416.667	-416.667	-427.083	-416.667	-416.667
	-395.833	-385.417	-385.417	-385.417	-395.833	-395.833	-395.833	-395.833	-385.417	-406.25	-385.417	-395.833	-395.833	-395.833		-385.417	-395.833	-395.833	-395.833	-395.833	-395.833	-406.25	-395.833	-395.833
	-375	-364.583	-364.583	-364.583	-375	-375	-375	-375	-364.583	-385.417	-364.583	-375	-375	-375		-364.583	-375	-375	-375	-375	-375	-385.417	-375	-375
	-354.167	-343.75	-343.75	-343.75	-354.167	-354.167	-354.167	-354.167	-343.75	-364.583	-343.75	-354.167	-354.167	-354.167	-364.583	-343.75	-354.167	-354.167	-354.167	-354.167	-354.167	-364.583	-354.167	-354.167
	-333.333	-322.917	-322.917	-322.917	-333.333	-333.333	-333.333	-333.333	-322.917	-343.75	-322.917	-333.333	-333.333	-333.333	-343.75	-322.917	-333.333	-333.333	-333.333	-333.333	-333.333	-343.75	-333.333	-333.333
	-312.5	-302.083	-302.083	-302.083	-312.5	-312.5	-312.5	-312.5	-302.083	-322.917	-302.083	-312.5	-312.5	-312.5	-322.917	-302.083	-312.5	-312.5	-312.5	-312.5	-312.5	-322.917	-312.5	-312.5
	-291.667	-281.25	-281.25		-291.667	-291.667	-291.667	-291.667	-281.25	-302.083	-281.25	-291.667	-291.667	-291.667	-302.083	-281.25	-291.667	-291.667	-291.667	-291.667	-291.667	-302.083	-291.667	-291.667
	-270.833	-260.417	-260.417		-270.833	-270.833	-270.833	-270.833	-260.417	-281.25	-260.417	-270.833	-270.833	-270.833	-281.25	-260.417	-270.833	-270.833	-270.833		-270.833	-281.25	-270.833	-270.833
	-250	-239.583	-239.583		-250	-250	-250		-239.583		-239.583	-250	-250	-250	-260.417	-239.583	-250	-250	-250		-250	-260.417	-250	-250
	-229.167	-218.75					-229.167		-218.75			-229.167	-229.167		-239.583	-218.75	-229.167	-229.167	-229.167		-229.167	-239.583	-229.167	-229.167
		-197.917							-197.917			-208.333			-218.75	-197.917	-208.333					-218.75
		-177.083										-187.5			-197.917	-177.083	-187.5
		-156.25													-177.083		-166.667
		-135.417													-156.25
		-114.583
		114.583
		135.417
		156.25
		177.083													156.25	177.083	166.667
		197.917							197.917			187.5			177.083	197.917	187.5
		218.75							218.75			208.333			197.917	218.75	208.333
	229.167	239.583	239.583				229.167		239.583		239.583	229.167	229.167		218.75	239.583	229.167	229.167	229.167		229.167	218.75	229.167	229.167
	250	260.417	260.417		250	250	250		260.417		260.417	250	250	250	239.583	260.417	250	250	250		250	239.583	250	250
	270.833	281.25	281.25		270.833	270.833	270.833	270.833	281.25		281.25	270.833	270.833	270.833	260.417	281.25	270.833	270.833	270.833		270.833	260.417	270.833	270.833
	291.667	302.083	302.083	302.083	291.667	291.667	291.667	291.667	302.083	281.25	302.083	291.667	291.667	291.667	281.25	302.083	291.667	291.667	291.667	291.667	291.667	281.25	291.667	291.667
	312.5	322.917	322.917	322.917	312.5	312.5	312.5	312.5	322.917	302.083	322.917	312.5	312.5	312.5	302.083	322.917	312.5	312.5	312.5	312.5	312.5	302.083	312.5	312.5
	333.333	343.75	343.75	343.75	333.333	333.333	333.333	333.333	343.75	322.917	343.75	333.333	333.333	333.333	322.917	343.75	333.333	333.333	333.333	333.333	333.333	322.917	333.333	333.333
	354.167	364.583	364.583	364.583	354.167	354.167	354.167	354.167	364.583	343.75	364.583	354.167	354.167	354.167	343.75	364.583	354.167	354.167	354.167	354.167	354.167	343.75	354.167	354.167
	375	385.417	385.417	385.417	375	375	375	375	385.417	364.583	385.417	375	375	375	364.583	385.417	375	375	375	375	375	364.583	375	375
	395.833	406.25	406.25	406.25	395.833	395.833	395.833	395.833	406.25	385.417	406.25	395.833	395.833	395.833	385.417	406.25	395.833	395.833	395.833	395.833	395.833	385.417	395.833	395.833
	416.667	427.083	427.083	427.083	416.667	416.667	416.667	416.667	427.083	406.25	427.083	416.667	416.667	416.667	406.25	427.083	416.667	416.667	416.667	416.667	416.667	406.25	416.667	416.667
	437.5	447.917	447.917	447.917	437.5	437.5	437.5	437.5	447.917	427.083	447.917	437.5	437.5	437.5	427.083	447.917	437.5	437.5	437.5	437.5	437.5	427.083	437.5	437.5
	458.333	468.75	468.75	468.75	458.333	458.333	458.333	458.333	468.75	447.917	468.75	458.333	458.333	458.333	447.917	468.75	458.333	458.333	458.333	458.333	458.333	447.917	458.333	458.333
	479.167	489.583	489.583	489.583	479.167	479.167	479.167	479.167	489.583	468.75	489.583	479.167	479.167	479.167	468.75	489.583	479.167	479.167	479.167	479.167	479.167	468.75	479.167	479.167
	500	510.417	510.417	510.417	500	500	500	500	510.417	489.583	510.417	500	500	500	489.583	510.417	500	500	500	500	500	489.583	500	500
	520.833	531.25	531.25	531.25	520.833	520.833	520.833	520.833	531.25	510.417	531.25	520.833	520.833	520.833	510.417	531.25	520.833	520.833	520.833	520.833	520.833	510.417	520.833	520.833
	541.667	552.083	552.083	552.083	541.667	541.667	541.667	541.667	552.083	531.25	552.083	541.667	541.667	541.667	531.25	552.083	541.667	541.667	541.667	541.667	541.667	531.25	541.667	541.667
	562.5	572.917	572.917	572.917	562.5	562.5	562.5	562.5	572.917	552.083	572.917	562.5	562.5	562.5	552.083	572.917	562.5	562.5	562.5	562.5	562.5	552.083	562.5	562.5
	583.333	593.75	593.75	593.75	583.333	583.333	583.333	583.333	593.75	572.917	593.75	583.333	583.333	583.333	572.917	593.75	583.333	583.333	583.333	583.333	583.333	572.917	583.333	583.333
	604.167	614.583	614.583	614.583	604.167	604.167	604.167	604.167	614.583	593.75	614.583	604.167	604.167	604.167	593.75	614.583	604.167	604.167	604.167	604.167	604.167	593.75	604.167	604.167
	625	635.417	635.417	635.417	625	625	625	625	635.417	614.583	635.417	625	625	625	614.583	635.417	625	625	625	625	625	614.583	625	625
	645.833	656.25	656.25	656.25	645.833	645.833	645.833	645.833	656.25	635.417	656.25	645.833	645.833	645.833	635.417	656.25	645.833	645.833	645.833	645.833	645.833	635.417	645.833	645.833
	666.667	677.083	677.083	677.083	666.667	666.667	666.667	666.667	677.083	656.25	677.083	666.667	666.667	666.667	656.25	677.083	666.667	666.667	666.667	666.667	666.667	656.25	666.667	666.667
	687.5	697.917	697.917	697.917	687.5	687.5	687.5	687.5	697.917	677.083	697.917	687.5	687.5	687.5	677.083	697.917	687.5	687.5	687.5	687.5	687.5	677.083	687.5	687.5
	708.333	718.75	718.75	718.75	708.333	708.333	708.333	708.333	718.75	697.917	718.75	708.333	708.333	708.333	697.917	718.75	708.333	708.333	708.333	708.333	708.333	697.917	708.333	708.333
	729.167	739.583	739.583	739.583	729.167	729.167	729.167	729.167	739.583	718.75	739.583	729.167	729.167	729.167	718.75	739.583	729.167	729.167	729.167	729.167	729.167	718.75	729.167	729.167
	750	760.417	760.417	760.417	750	750	750	750	760.417	739.583	760.417	750	750	750	739.583	760.417	750	750	750	750	750	739.583	750	750
	770.833	781.25	781.25	781.25	770.833	770.833	770.833	770.833	781.25	760.417	781.25	770.833	770.833	770.833	760.417	781.25	770.833	770.833	770.833	770.833	770.833	760.417	770.833	770.833
	791.667	802.083	802.083	802.083	791.667	791.667	791.667	791.667	802.083	781.25	802.083	791.667	791.667	791.667	781.25	802.083	791.667	791.667	791.667	791.667	791.667	781.25	791.667	791.667
	812.5	822.917	822.917	822.917	812.5	812.5	812.5	812.5	822.917	802.083	822.917	812.5	812.5	812.5	802.083	822.917	812.5	812.5	812.5	812.5	812.5	802.083	812.5	812.5
	833.333	843.75	843.75	843.75	833.333	833.333	833.333	833.333	843.75	822.917	843.75	833.333	833.333	833.333	822.917	843.75	833.333	833.333	833.333	833.333	833.333	822.917	833.333	833.333
	854.167	864.583	864.583	864.583	854.167	854.167	854.167	854.167	864.583	843.75	864.583	854.167	854.167	854.167	843.75	864.583	854.167	854.167	854.167	854.167	854.167	843.75	854.167	854.167
	875	885.417	885.417	885.417	875	875	875	875	885.417	864.583	885.417	875	875	875	864.583	885.417	875	875	875	875	875	864.583	875	875
	895.833	906.25	906.25	906.25	895.833	895.833	895.833	895.833	906.25	885.417	906.25	895.833	895.833	895.833	885.417	906.25	895.833	895.833	895.833	895.833	895.833	885.417	895.833	895.833
	916.667	927.083	927.083	927.083	916.667	916.667	916.667	916.667	927.083	906.25	927.083	916.667	916.667	916.667	906.25	927.083	916.667	916.667	916.667	916.667	916.667	906.25	916.667	916.667
	937.5	947.917	947.917	947.917	937.5	937.5	937.5	937.5	947.917	927.083	947.917	937.5	937.5	937.5	927.083	947.917	937.5	937.5	937.5	937.5	937.5	927.083	937.5	937.5
	958.333	968.75	968.75	968.75	958.333	958.333	958.333	958.333	968.75	947.917	968.75	958.333	958.333	958.333	947.917	968.75	958.333	958.333	958.333	958.333	958.333	947.917	958.333	958.333
	979.167	989.583	989.583	989.583	979.167	979.167	979.167	979.167	989.583	968.75	989.583	979.167	979.167	979.167	968.75	989.583	979.167	979.167	979.167	979.167	979.167	968.75	979.167	979.167
	1000	1010.42	1010.42	1010.42	1000	1000	1000	1000	1010.42	989.583	1010.42	1000	1000	1000	989.583	1010.42	1000	1000	1000	1000	1000	989.583	1000	1000
	1020.83	1031.25	1031.25	1031.25	1020.83	1020.83	1020.83	1020.83	1031.25	1010.42	1031.25	1020.83	1020.83	1020.83	1010.42	1031.25	1020.83	1020.83	1020.83	1020.83	1020.83	1010.42	1020.83	1020.83
	1041.67	1052.08	1052.08	1052.08	1041.67	1041.67	1041.67	1041.67	1052.08	1031.25	1052.08	1041.67	1041.67	1041.67	1031.25	1052.08	1041.67	1041.67	1041.67	1041.67	1041.67	1031.25	1041.67	1041.67
	1062.5	1072.92	1072.92	1072.92	1062.5	1062.5	1062.5	1062.5	1072.92	1052.08	1072.92	1062.5	1062.5	1062.5	1052.08	1072.92	1062.5	1062.5	1062.5	1062.5	1062.5	1052.08	1062.5	1062.5
	1083.33	1093.75	1093.75	1093.75	1083.33	1083.33	1083.33	1083.33	1093.75	1072.92	1093.75	1083.33	1083.33	1083.33	1072.92	1093.75	1083.33	1083.33	1083.33	1083.33	1083.33	1072.92	1083.33	1083.33
	1104.17	1114.58	1114.58	1114.58	1104.17	1104.17	1104.17	1104.17	1114.58	1093.75	1114.58	1104.17	1104.17	1104.17	1093.75	1114.58	1104.17	1104.17	1104.17	1104.17	1104.17	1093.75	1104.17	1104.17
	1125	1135.42	1135.42	1135.42	1125	1125	1125	1125	1135.42	1114.58	1135.42	1125	1125	1125	1114.58	1135.42	1125	1125	1125	1125	1125	1114.58	1125	1125
	1145.83	1156.25	1156.25	1156.25	1145.83	1145.83	1145.83	1145.83	1156.25	1135.42	1156.25	1145.83	1145.83	1145.83	1135.42	1156.25	1145.83	1145.83	1145.83	1145.83	1145.83	1135.42	1145.83	1145.83
	1166.67	1177.08	1177.08	1177.08	1166.67	1166.67	1166.67	1166.67	1177.08	1156.25	1177.08	1166.67	1166.67	1166.67	1156.25	1177.08	1166.67	1166.67	1166.67	1166.67	1166.67	1156.25	1166.67	1166.67
	1187.5	1197.92	1197.92	1197.92	1187.5	1187.5	1187.5	1187.5	1197.92	1177.08	1197.92	1187.5	1187.5	1187.5	1177.08	1197.92	1187.5	1187.5	1187.5	1187.5	1187.5	1177.08	1187.5	1187.5
	1208.33		1218.75	1218.75	1208.33	1208.33	1208.33	1208.33	1218.75	1197.92	1218.75	1208.33	1208.33	1208.33	1197.92	1218.75	1208.33	1208.33	1208.33	1208.33	1208.33	1197.92	1208.33	1208.33
	1229.17		1239.58	1239.58	1229.17	1229.17	1229.17	1229.17	1239.58	1218.75	1239.58	1229.17	1229.17	1229.17	1218.75	1239.58	1229.17	1229.17	1229.17	1229.17	1229.17	1218.75	1229.17	1229.17
	1250		1260.42	1260.42	1250	1250	1250	1250	1260.42	1239.58	1260.42	1250	1250	1250	1239.58	1260.42	1250	1250	1250	1250	1250	1239.58	1250	1250
	1270.83		1281.25	1281.25	1270.83	1270.83	1270.83	1270.83	1281.25	1260.42	1281.25	1270.83	1270.83	1270.83				1270.83	1270.83	1270.83	1270.83	1260.42	1270.83	1270.83
	1291.67		1302.08	1302.08	1291.67	1291.67	1291.67	1291.67		1281.25	1302.08		1291.67	1291.67				1291.67	1291.67	1291.67	1291.67	1281.25	1291.67	1291.67
	1312.5		1322.92	1322.92	1312.5	1312.5	1312.5	1312.5		1302.08	1322.92		1312.5	1312.5				1312.5	1312.5	1312.5	1312.5	1302.08	1312.5	1312.5
				1343.75	1333.33	1333.33		1333.33		1322.92				1333.33						1333.33
				1364.58				1354.17		1343.75										1354.17
				1385.42						1364.58										1375

## Sheet: ChBF_RE
	Choroidal Blood Flow (mL/mL/min)
Subject	1	2	3	4	5	6	7	8	9	10	11	12	*101	103	104	105	106	107	108	109	110	111	112	113
Group	C57BL/6J	C57BL/6J	C57BL/6J	C57BL/6J	C57BL/6J	C57BL/6J	C57BL/6J	C57BL/6J	C57BL/6J	C57BL/6J	C57BL/6J	C57BL/6J	DBA/2J	DBA/2J	DBA/2J	DBA/2J	DBA/2J	DBA/2J	DBA/2J	DBA/2J	DBA/2J	DBA/2J	DBA/2J	DBA/2J
				7.50033
				8.10346																5.1301
				8.15775				5.23496		4.90253					1.53627					4.79601
			5.93949	8.19113	7.60627	5.39931		5.60255		4.47983	8.17609				2.32173					4.488
	8.00608		5.55974	8.48769	7.9935	5.72643	8.72606	5.5597		4.21422	8.2738		3.84894	3.16854	3.23861			3.39925	3.24323	4.49015	1.32959		2.06367	1.75519
	7.33927		4.83051	8.41532	7.84233	6.11335	8.27278	5.54403	3.10141	4.04282	9.34562		3.44027	3.8167	3.67151			3.25432	3.86714	4.56506	1.89554	2.53936	2.27766	2.10373
	6.44366		4.32313	8.10241	7.20407	5.69597	8.07868	5.67198	3.35237	3.99381	9.90561	8.53526	3.71957	5.21375	3.10502	6.30303		3.70353	4.07479	4.50441	2.34651	2.79125	2.69406	2.27875
	7.13859		4.35325	7.93248	6.77261	5.48538	7.82352	5.39822	3.68206	3.85904	9.14653	8.27365	4.75043	5.75512	2.27211	6.64519	3.22087	4.2954	3.91965	4.33645	2.72234	2.65497	2.74097	2.91652
	9.0651		4.39878	7.95558	6.62415	6.1244	7.81635	5.58382	3.89318	3.18783	8.09825	7.88914	5.47655	4.36106	2.13521	6.89049	2.04952	4.31614	4.27127	4.39528	2.41328	2.63411	2.82262	2.88141
	9.50979	2.03437	4.30217	6.99787	6.69491	6.33004	7.64181	6.25114	3.97635	3.29435	7.94313	7.42165	5.75284	2.10421	2.67855	7.23078	1.74825	4.31808	5.05001	4.89237	1.89622	3.00932	3.61662	2.9031
	9.69139	3.31922	4.14958	5.70596	6.84303	6.04221	8.35152	6.4315	4.30587	4.05301	8.49955	7.49392	6.04198	1.99027	2.93884	7.25499	2.07027	5.13268	5.20023	5.32817	2.03847	3.39222	4.44884	3.24617
	10.2391	3.96695	4.06329	5.4316	7.38746	6.00492	9.017	6.39203	5.08242	4.38905	8.80072	8.15067	6.46322	3.51493	3.05575	6.68635	2.56509	6.42538	4.67638	5.46616	2.41843	3.2624	4.45637	3.40459
	10.2366	3.89184	4.2392	5.98292	8.46984	5.70768	9.1413	6.75034	5.55463	5.09515	9.1531	8.88369	6.85907	4.70302	3.64492	6.05548	3.23244	7.54722	4.45004	5.65222	3.11185	2.79884	4.04269	3.39612
	10.6175	4.15228	4.64286	7.01606	8.92038	6.02611	8.30427	6.45544	5.60075	6.2214	9.32474	9.54274	7.54234	5.39817	4.25385	5.56812	3.27657	7.59298	5.1365	5.84315	3.69076	2.80116	4.1474	3.55812
	11.6343	4.79101	5.15878	7.65773	8.41129	7.53264	7.48912	6.40216	5.88759	6.39921	9.68709	9.40346	8.09762	5.87292	4.58137	5.43963	3.00523	6.66788	5.55577	5.92526	3.73351	3.2356	5.16802	4.00547
	11.2246	5.43204	5.33589	7.83898	7.08517	8.93927	7.47329	6.98211	6.11879	6.51817	9.04126	9.05811	8.41966	7.51245	4.53035	6.54545	2.63311	5.94368	5.33357	6.08329	3.77381	3.60094	5.63991	3.7731
	9.70554	5.96109	5.46148	7.33164	7.41763	9.19511	7.96537	7.35461	5.80966	7.9173	9.15212	9.51446	7.97454	8.48597	4.49678	7.63605	2.1513	5.36787	4.88285	6.56763	4.23495	3.6662	5.7245	3.37164
	8.96822	6.75628	5.43212	6.78962	9.44545	8.28525	8.11373	7.43378	5.39251	10.0587	10.0597	10.041	7.06935	6.76516	4.64073	7.32284	2.0412	6.1345	4.79822	7.03534	4.37628	3.80855	6.18905	3.84852
	9.13749	6.53243	5.29852	7.16838	9.91725	7.28823	7.84004	7.47558	6.50829	10.0485	10.144	10.7392	6.3854	6.0734	4.71427	6.96222	2.93549	7.49434	5.16727	6.85158	4.39565	5.12243	6.01473	4.37845
	9.84329	6.45914	5.44279	7.82924	8.86936	7.21767	7.81633	6.80036	8.01018	9.27863	9.45361	11.0604	5.87208	6.58887	5.16514	7.45726	3.48475	9.04498	5.14006	6.54461	4.78668	6.40167	5.64637	4.04042
	10.5755	7.93987	6.0679	8.24514	8.08212	6.84676	8.52556	6.11895	8.81582	9.69903	9.56453	10.7817	5.43258	6.17112	4.96186	7.92102	3.79122	9.92516	5.14842	6.66439	5.42919	6.53437	5.82598	3.87902
	10.9857	10.0894	6.66519	8.71287	7.69521	6.89569	9.82298	6.24114	8.84091	11.2303	9.13796	10.5237	5.38009	5.1377	4.87198	8.17689	4.30746	9.28452	5.72667	7.09076	5.32019	5.82887	6.70328	3.92317
	10.5589	9.87959	6.55816	9.55557	7.11328	8.01296	10.1483	6.94371	9.42464	12.2407	9.34633	10.2269	5.49713	4.92488	4.86565	7.92161	4.68975	8.39158	5.7735	7.13423	5.40974	5.28124	7.7439	3.54938
	9.85931	9.32635	6.83715	10.1683	6.6923	9.24339	10.2413	7.4461	9.4853	12.0228	9.81257	10.4877	6.05875	4.42957	4.47773	7.64155	4.22618	8.89683	4.93332	7.25876	5.79524	4.78909	8.16565	3.25732
	9.47114	9.75432	7.81394	9.96327	6.95504	8.84736	10.7648	7.50293	8.43747	12.152	9.54444	10.7032	5.84182	3.87116	4.84013	7.68187	3.43624	9.55489	4.09644	7.908	5.91392	5.60764	8.4185	3.82958
	9.31018	10.0515	8.3044	9.64599	7.21464	7.64117	11.5495	7.32072	8.67734	11.7372	9.07204	10.5861	5.43148	4.51938	4.73756	8.2987	3.28646	8.93994	4.11125	8.73838	6.19154	6.69077	7.85802	3.88049
	10.5115	9.44702	7.97803	9.64705	7.60423	7.01604	11.3652	7.30096	10.5587	10.7867	9.39213	10.4738	5.17378	5.83897	4.46079	9.36167	3.75664	8.62834	4.75851	8.88359	6.98692	7.78379	7.75751	4.11219
	10.5976	9.3299	7.50072	9.03563	9.45722	6.52206	10.7619	7.39253	9.86865	11.8629	9.34557	10.2481	4.69651	6.83838	4.59449	10.0277	4.22971	9.73007	5.39877	9.01738	8.10016	9.26139	8.86922	5.07805
	9.81278	9.10754	6.97958	8.80924	11.2492	6.66979	10.6772	7.3479	9.34844	11.9131	9.2298	9.78528	5.05448	7.39089	4.93588	9.85401	4.41827	9.51631	5.63322	8.89451	8.19618	10.1314	9.4744	4.97125
	9.67417	7.90579	7.09361	9.15982	10.6041	6.66179	11.0098	7.05915	9.5628	10.9898	9.92468	9.26801	6.48372	6.51496	5.16744	9.55993	4.43493	9.05922	4.93377	8.24004	7.63785	9.79378	9.44751	4.92829
	9.49467	6.86088	7.49502	8.98849	9.57039	7.28256	10.6632	7.51205	9.53636	10.7371	9.85199	8.76183	7.67572	5.18498	5.01235	9.89153	4.74542	9.158	4.63627	8.49377	8.53937	9.18014	9.69598	5.38215
	9.51013	5.92289	7.40966	9.14754	10.0325	7.8957	11.9373	8.25094	9.52189	11.1853	9.21603	7.65295	7.61372	4.30287	5.10996	9.98739	5.63942	9.16809	4.7717	9.48109	8.29952	8.47761	9.90352	5.53848
	9.86047	5.51666	7.98756	9.92618	10.8566	8.4309	13.1159	8.42352	9.63875	11.0554	9.03481	6.98052	7.31121	3.80701	5.84728	10.1812	6.14028	8.56052	5.00216	9.59215	7.0655	7.83005	9.87157	5.87903
	10.0599	5.43554	8.53811	10.4213	10.7051	9.45486	12.8603	8.87496	9.32858	10.983	8.73864	7.10417	7.37662	3.56352	5.95892	10.2036	5.7598	7.85075	6.07025	8.76954	6.59631	7.91607	10.317	6.62803
	10.0665	6.23149	8.75155	9.93386	10.4579	9.33967	12.1532	8.79176	9.63845	9.94034	9.02412	7.07562	7.38357	3.86509	5.77357	10.1939	4.73985	7.98464	6.50264	8.18595	6.51094	8.69333	9.62308	7.30136
	9.77481	6.49509	8.36224	9.51413	10.96	8.96962	10.9358	8.34841	9.58421	9.139	9.46603	7.52777	7.46138	4.6443		10.7555	4.23805	8.88533	6.63692	7.58758	5.87144	8.24595	9.08887	6.83488
	9.33183	6.51766	7.71022	9.37471	10.2058	9.4955	8.84664	7.78478	8.72584	9.63599	9.24138	7.60077	7.56681	4.77654		10.9806	5.28352	9.1149	6.78242	7.23106	5.0374	7.51382	8.78509	6.95375
	9.60115	7.24998	7.40009	9.80135	9.31772	10.6076	7.98209	7.49384	8.30559	9.68546	9.1225	6.87293	7.12922	4.47841		9.96248	6.01119	9.33622	6.40194	7.31243	4.8247	7.83645	9.35477	6.33065
	10.6678	8.15564	7.98533	10.3544	9.4087	10.8676	7.84563	7.48121	8.34076	10.5076	9.37544	6.46868	7.28076	3.97059		8.81798	5.56211	10.5129	6.24064	7.48634	5.1677	8.32203	9.76398	4.09171
	11.3894	8.63111	8.478	10.3189	9.17427	10.2725	8.27462	7.54518	9.25068	10.3221	8.81323	6.43605	9.13665	3.83023		8.28727	4.69086	10.8808	6.06247	7.36625	5.29786	8.10378	8.9594	2.90423
	11.6604	8.60177	8.97049	10.657	8.66952	10.2761	9.18634	7.75258	10.9193	9.96559	8.14201	7.09483	9.68561	4.68194		8.81931	4.18953	10.2829	5.5713	7.31706	5.4489	7.68673	9.01142	3.84841
	11.4787	9.01705	8.82126	10.0542	9.35059	11.0916	9.59458	7.91867	11.0076	10.5795	8.27106	7.65236	8.15574	5.43704		9.33026	4.68562	9.27774	5.45862	7.42351	5.86952	7.85704	9.68687	4.59127
	11.5783	9.19668	8.39407	9.75367	10.7466	10.6831	10.4408	7.86507	10.656	9.81732	8.85829	7.14392	6.43065	5.96198		8.75517	6.20636	8.22895	5.64701	7.8581	5.89782	7.05588	10.5934	4.22694
	11.9147	8.64899	8.44465	9.50705	11.5918	9.17025	11.2905	7.5464	10.7826	9.53834	9.53729	6.62203	6.15406	6.24235		8.05483	6.65723	8.86827	5.77444	8.15611	5.7703	6.26585	10.842	3.43384
	10.7462	8.97662	8.65759	9.0408	12.2536	9.16547	11.5955	7.32445	10.3958	9.66914	9.85198	6.31388	7.15268	5.98292		7.47713	5.94128	9.58499	5.70485	7.80351	6.69763	7.0008	10.3396	3.0576
	10.0678	9.62221	9.31212	9.37446	10.6772	9.6965	12.4871	7.12887	10.4474	9.3675	10.0974	6.09628	8.00079	5.15652		6.99114	4.99557	9.37362	5.02928	7.23304	7.35763	6.88339	10.5007	3.68297
	9.11728	10.1138	9.47106	9.7682	9.01687	9.76445	13.1171	7.35338	10.0001	8.06008	10.2237	6.19137	7.85337	5.07705		6.93098	4.63715	8.74803	4.24223	6.63773	8.14942	5.56944	10.5879	5.07897
	9.34887	10.1154	8.56167	10.0001	9.21803	9.26594	12.6581	7.45949	9.1426	7.94047	9.77302	6.54287	8.0677	6.46374		7.26726	5.12231	7.34974	3.76673	6.30066	8.88254	5.37385	10.1392	6.25684
	9.11743	9.38917	8.17059	9.91761	9.35337	8.37381	11.2183	7.42389	9.47944	8.49977	9.05697	6.58463	9.58199	6.27099		7.98677	5.35528	6.62761	3.4354	7.03516	8.54133	5.98539	9.25595	5.76315
	8.95889	8.73397	8.25708	9.63147	9.6288	7.91685	11.4372	7.52724	9.43643	8.52243	8.66947	6.54189	10.9531	5.75034		8.91232	4.81294	7.40331	3.31914	8.04079	7.64392	5.87043	8.30652	5.53396
	9.45692	8.92151	8.44863	9.44109	9.99182	8.17289	12.0999	7.00871	9.60035	8.06184	8.29994	6.4566	9.21398	4.96042	3.49311	9.65247	3.56936	9.17595	3.53052	9.17378	7.02577	6.08821	8.09381	5.3571
	9.4754	10.3175	9.29222	9.37723	10.4004	8.23338	11.9548	6.82249	9.81372	8.5935	8.26945	5.77512	6.27478	3.93774	3.88714	9.28394	2.81244	10.211	3.88062	9.62801	6.66452	6.12819	8.05487	4.37722
	9.97586	10.7021	9.5478	9.04044	10.8597	8.19016	11.4708	7.9245	10.0133	8.34516	8.75807	5.18713	6.61803	3.53533	4.80026	8.46778	3.78463	9.92028	3.83823	9.38557	6.12511	5.9247	7.76655	3.24555
	10.5415	9.13945	8.87287		10.1801	7.9746	9.87682	8.96058	10.3307	8.55152	8.71208	5.02372	7.17303	3.75093	5.38558	8.55145	4.38227	8.86977	3.5498	9.63241	6.02805	6.29748	7.78595	3.15405
	10.8612	7.92053	9.42858		9.59334	7.86858	9.38705	8.74822	10.1149	8.41443	7.85714	4.99469	8.51995	4.14467	5.24265	9.02576	3.5053	8.43898	3.30626		5.93428	6.47079	8.78865	3.93663
	10.8971	8.86335	9.63759		9.26421	7.94429	8.62558		10.4475		6.75813	5.06098	7.57821	4.47211	4.84133	9.28028	2.83437	8.27978	3.12439		5.86111	5.74213	9.51628	3.87271
	9.9915	10.5931					10.0658		10.2017			5.28512	5.66447		4.45954	9.39764	3.36929	8.12641	3.30971		6.5491	5.55627	9.16575	3.24454
		10.7368							10.3334			5.27531			4.33241	9.88704	4.45675					6.10271
		9.35179										4.78956			4.93092	9.79812	4.69596
		8.43167													5.06481		4.41231
		7.85544													5.15191
		7.5892
		8.88396
		9.60605
		9.90008
		9.84889													3.16824	5.97815	3.77589
		9.59701							8.27539			7.52816			3.20535	6.28148	4.05709
		9.0207							7.74985			8.1348			3.36204	6.2234	4.25466
	7.73173	8.25193	7.52033				8.48426		7.53601		7.07242	8.24677	6.63564		3.75631	5.85176	4.61246	5.92432	5.41457		5.84121	5.87224	7.90629	5.27938
	8.76188	7.42743	7.54305		9.668	4.6224	9.04923		7.55061		7.53641	7.85835	5.77935	1.25091	3.55942	6.17399	4.81235	4.77696	5.04183		5.29389	6.09896	7.42065	5.21134
	9.3271	6.72969	8.07273		10.0836	4.71877	9.55977	5.46587	7.6372		7.72281	7.66674	4.0372	1.82986	3.45885	7.31367	4.62838	4.21567	4.20552		5.40096	5.96305	7.1506	4.43943
	9.1023	6.65722	7.95664	7.00564	9.40023	5.26919	10.4414	6.28345	7.92899	7.34412	7.29019	7.61184	4.80312	2.67063	3.76214	7.49995	4.11482	4.0025	3.61465	4.79263	5.84871	5.86342	7.3009	3.69451
	8.616	6.82771	7.54456	6.92076	8.78413	6.17268	10.3532	6.99945	7.81912	7.74367	7.34101	7.72395	6.16061	3.50735	4.13474	6.39663	3.83685	4.14425	3.46649	5.44397	6.04774	5.9112	7.72928	3.56523
	8.11897	6.76023	6.88619	6.87785	8.68857	6.78174	9.22448	6.42894	7.31179	7.81396	7.5372	7.58048	6.8933	3.01774	4.24352	5.894	3.56103	4.15078	3.02847	6.11353	5.59647	6.60415	7.97929	3.86438
	7.60735	6.78418	6.51431	6.89106	8.90626	6.94904	8.26969	5.66034	6.88637	7.33352	7.84581	7.30467	6.98728	3.03931	4.02093	6.34801	3.69682	4.25504	2.73606	6.79035	4.87884	7.91998	7.78444	4.11708
	7.11464	7.13253	6.47248	6.96777	9.40449	6.69052	7.88078	5.53426	6.66516	6.30162	8.44775	7.12119	6.50104	3.86707	4.14524	6.69195	3.60365	4.82077	2.85621	7.24341	4.56139	8.43523	7.50141	4.19173
	6.47707	6.91071	6.52439	7.34704	9.15858	6.18626	8.02655	5.83085	6.69939	5.88855	9.07773	7.36233	6.44786	4.64776	4.15121	5.89742	3.5362	5.67901	3.09059	7.75642	4.81107	8.65637	7.41879	4.12877
	6.37826	6.73947	6.3082	8.07715	8.15564	5.35849	8.89431	6.33213	6.65835	7.04813	9.34193	8.03067	6.52321	4.39217	4.13658	4.73315	3.79931	6.26665	3.31467	8.38018	5.69188	8.50168	7.69128	4.61429
	6.5764	7.29039	5.61042	8.29356	7.99116	5.17816	9.48595	6.46646	6.17355	8.31129	9.53503	8.37001	6.4071	4.19457	4.36608	4.65843	4.46324	7.11896	3.4549	8.84559	7.32563	7.59873	8.29846	5.40199
	6.94574	7.8174	5.14949	7.96498	8.35473	5.64402	9.83509	6.29182	5.43809	9.23249	9.92083	8.14828	6.0644	4.2023	4.52408	5.5915	4.63489	7.28854	3.20307	8.74835	8.67887	6.97403	8.04506	6.05861
	7.36307	8.21802	5.24877	7.51756	8.26824	6.01173	9.95747	6.45995	4.86891	9.13875	9.90266	7.10401	5.68054	4.17825	4.65226	6.40187	4.18343	7.16953	2.95321	8.38096	9.74183	7.07854	7.4201	6.12938
	7.59063	8.1943	5.86344	7.04593	8.0907	6.31113	9.84735	6.80985	5.11897	8.10047	9.58893	6.79521	5.63961	4.25434	4.6701	6.41237	3.28564	7.08404	3.43132	7.93805	9.93393	7.47744	7.07345	6.01491
	7.60778	7.39359	6.49888	7.07898	7.95928	6.18999	9.34168	7.00639	6.20326	7.64132	8.81574	7.75775	5.99372	4.16832	4.32184	5.38396	3.9456	7.12784	4.08237	7.51085	9.45281	8.03892	7.2912	5.52063
	7.60978	7.06239	6.7018	7.57249	8.10765	7.25821	8.95303	7.05385	7.29727	7.485	7.95263	8.57103	6.13839	4.40809	3.78581	5.42517	6.01354	7.36131	4.33709	7.44817	9.49506	7.58234	7.56725	5.16381
	7.5647	7.61433	6.83137	7.6452	9.23634	7.90562	8.68591	7.03661	7.07324	7.07345	7.43608	8.37145	6.48131	4.4524	3.31763	5.6917	6.2379	7.50568	4.53222	7.63447	9.69089	6.35699	7.48812	5.51806
	7.55826	7.99632	6.92675	7.26292	9.86223	8.23236	8.82154	6.96668	5.76539	7.3672	7.34312	7.80725	6.29848	4.27253	3.41325	5.67049	4.8189	7.49854	4.47078	7.80536	9.68301	5.50597	7.27937	6.38089
	7.81972	7.98634	6.55934	6.81975	9.52146	8.57035	9.70656	7.21323	4.93216	8.03841	7.72846	7.23182	5.86722	3.0757	4.27004	5.45272	4.0244	7.53158	4.37775	7.82977	9.3063	4.9606	7.06292	6.74675
	7.05616	7.76076	5.93108	6.53745	8.52756	8.50187	9.95674	7.75707	4.99196	8.16687	8.27683	7.07209	5.22311	2.2472	4.96943	5.58263	3.7952	7.57698	4.63621	7.73624	8.76549	5.21584	6.86798	6.46135
	6.93972	7.31897	6.03371	7.05121	7.74614	8.12362	9.03885	7.89985	6.91248	8.0861	8.67288	7.6103	5.40653	2.15293	5.20396	5.86994	4.1671	7.23488	4.77725	7.37849	8.34652	6.06559	6.77149	6.49048
	7.18745	7.32476	6.28801	7.83302	7.99868	7.93403	7.72524	7.72287	8.52107	7.5768	8.64048	8.3737	6.65248	2.65083	4.9623	5.59241	4.45808	6.70277	4.2678	6.67706	7.87983	6.48966	6.66844	6.27739
	7.53966	8.10133	6.50567	8.20459	8.32745	7.96453	7.14226	7.69567	8.6818	6.98653	8.53108	8.35051	6.90741	3.40088	5.03391	4.89552	5.2392	6.49674	3.66401	6.44064	7.8023	6.58661	6.44575	5.32737
	8.05028	8.95652	6.92765	8.29122	8.26921	7.71588	7.17074	7.7545	8.57184	7.00376	8.6092	7.66243	6.21773	3.6823	5.19703	4.76865	5.09844	6.60301	3.26048	6.81945	7.79226	7.00378	6.27234	4.8011
	8.38399	9.05534	7.19043	8.04852	8.00429	7.40798	7.38317	7.78848	8.81668	7.20526	8.73287	6.90313	4.47029	3.55238	5.09061	5.08811	4.82585	7.43043	3.14569	7.48282	7.87798	7.60653	6.61554	5.10417
	8.7608	9.01008	7.3816	7.5098	7.70356	7.3642	7.76969	7.77732	8.81481	6.53855	9.03571	6.44359	3.52113	2.96994	4.80841	5.27872	4.45856	8.38516	3.77718	8.6012	7.83977	7.88405	7.05341	6.04859
	9.36896	8.56137	7.42655	7.31487	7.75944	7.34952	7.9102	7.73823	8.82971	6.68418	8.99011	6.84121	3.37064	2.65266	4.77541	5.3964	4.6871	8.12096	4.54036	8.90187	7.71329	8.0939	7.04264	6.21802
	9.42064	7.55436	7.30243	7.77753	7.93087	7.44402	7.77947	7.6229	8.3687	7.33923	8.85044	7.38477	3.88353	2.61613	4.86911	5.51576	5.03586	7.51929	4.75736	8.11215	7.55983	7.80384	6.79614	5.73152
	8.63958	7.3247	7.43505	7.86129	8.0294	7.66052	7.43972	7.58525	8.14736	7.93707	8.78978	7.65166	4.64183	2.72448	4.68677	5.46603	5.49091	7.31126	4.87886	7.03632	7.76121	7.46817	6.45182	5.19381
	7.95568	7.60016	7.9025	7.62955	8.08603	7.31334	7.4529	7.27795	8.38352	8.17751	8.94579	8.07274	5.21349	3.16504	4.12564	5.46196	5.82009	7.41029	5.00871	5.70537	8.00451	7.01918	6.37163	4.82835
	7.44812	8.05592	7.64325	7.65067	8.09074	7.37002	7.91873	6.43781	8.72104	7.57407	9.07001	8.03986	5.67587	3.51452	3.6856	5.4069	5.0902	7.91272	4.97917	5.11363	8.21856	6.49405	6.77219	4.82709
	7.02073	8.00753	7.14291	7.77229	7.99941	7.94771	8.44962	5.94265	8.78621	7.25047	9.05755	7.42642	5.89126	3.24942	4.0377	4.69039	4.48101	7.95667	4.67663	5.38699	7.84958	5.19637	7.26885	5.09941
	7.44706	7.43928	6.7682	7.94338	7.74505	8.82023	8.89414	5.79696	8.82849	7.23221	9.03624	7.17528	5.74237	2.87776	4.73216	4.28801	4.37058	7.25494	4.33316	6.14981	7.57188	4.51216	7.55733	5.45513
	8.0958	7.20858	6.65193	8.49589	7.51433	9.51591	8.90766	6.22068	8.97412	7.10491	8.51608	7.45942	5.51057	3.00068	4.49605	4.76091	4.2978	6.503	4.34869	6.89018	7.4622	4.26514	7.71627	5.71355
	8.06549	7.61216	7.16439	8.52582	7.66925	8.92231	8.60016	6.53908	9.1381	7.0254	7.95507	7.2912	5.07828	3.14374	3.92705	5.05772	4.58223	6.30267	4.53508	7.17706	7.60382	4.84758	7.48044	6.24694
	8.03262	8.07423	7.99465	7.9545	8.39272	7.96172	8.15219	6.81833	9.02949	7.01554	7.84906	6.75378	4.53275	3.78297	3.57002	5.07967	4.87386	6.54778	4.71375	7.45069	7.33099	5.76517	7.53603	6.58436
	7.99057	8.3291	8.41697	7.43757	9.01899	7.56978	8.16287	6.96623	8.31772	7.30545	7.8845	6.50984	3.91782	4.54289	3.3731	4.56735	5.00604	7.00437	4.41734	7.56808	6.47834	6.5662	7.58768	6.64434
	8.14376	8.47287	8.50404	7.48154	9.40166	7.36637	8.3396	6.9341	7.53627	7.78255	8.36119	6.57212	3.90275	4.78027	3.02574	4.85512	4.72049	7.72871	4.08362	7.48331	5.85205	6.43558	7.61405	6.08873
	8.40515	8.66929	8.37796	7.60565	9.6217	7.80566	8.40424	6.86054	6.95335	8.19552	8.79678	6.76517	4.17969	4.36265	2.37629	5.94959	4.61236	8.1035	3.61349	7.29726	5.61149	5.97134	7.72316	5.48809
	8.53217	8.62475	7.97061	7.57024	9.64069	8.38883	8.29908	6.71971	6.67614	8.29259	8.30249	7.42226	4.26727	3.36337	2.75125	6.03365	4.7825	8.09089	3.68375	7.087	5.73904	5.45215	7.50845	5.90903
	8.64022	8.77993	7.81716	7.73303	9.67159	8.43914	8.0241	6.74829	6.97478	8.65971	7.77541	7.42903	4.12486	3.06846	3.54156	5.42267	4.69873	8.07112	4.23073	6.83856	6.54612	4.97643	7.09902	6.49107
	8.83816	8.79399	7.98893	7.98167	9.50987	8.24404	8.00051	7.45876	7.33559	8.81597	7.81324	6.86486	3.76159	3.72293	3.95635	5.0882	4.56117	7.84738	4.65276	6.48453	7.06138	4.66035	6.64622	7.00915
	9.22726	8.55943	8.13698	8.00722	9.39356	7.5583	8.07815	7.77443	7.30935	8.40965	8.06975	6.69006	3.69501	4.11045	4.00966	4.9401	4.41742	7.47031	4.96898	6.34321	7.2601	4.29658	6.51663	6.70132
	10.4545	8.5224	8.22599	7.57679	9.22486	7.34721	8.21477	7.21096	6.65183	8.1003	8.24153	7.10365	3.56879	4.61172	3.79136	4.828	4.51412	8.03357	5.20263	6.72426	7.09203	4.15575	6.83244	5.3618
	10.8671	8.71585	8.19203	7.05245	9.31129	7.80263	8.18896	7.05312	5.88762	7.37166	8.11818	7.02261	3.54059	5.20606	3.6152	4.56895	3.49478	9.02432	5.36939	7.25839	6.56408	4.32764	6.87067	4.4049
	9.90525	9.2231	7.90362	7.05168	9.41944	8.16212	7.78939	7.13224	5.62687	6.89337	7.97342	7.57615	3.51827	4.98445	3.32665	5.05922	3.41664	9.61775	5.37163	7.5437	6.28765	4.79745	6.70697	4.07149
	9.11906	9.57866	7.84974	7.61604	9.62158	8.20552	7.84519	7.56029	5.32403	6.74619	8.14125	8.12545	3.66394	4.3355	2.64922	5.48458	4.48626	9.80743	5.19997	7.40346	6.26831	5.19803	6.81531	4.16567
	9.10399		8.26017	7.77024	9.64202	8.35868	8.40973	8.35167	5.37224	7.06024	8.46041	7.47248	3.92722	3.64491	2.13037	5.78941	5.25303	9.23626	4.72043	6.98034	6.19554	5.59485	7.49127	4.6641
	9.20943		8.82857	7.5404	8.93427	8.162	8.83146	8.37777	5.44358	7.70917	8.44384	6.81043	4.1559	3.53333	2.08977	5.81391	5.13642	8.3202	3.62107	6.55849	6.08063	6.03026	8.05907	5.26906
	9.3819		9.09268	7.65664	8.03871	7.9352	9.09783	7.74056	5.79366	7.63422	8.22833	6.54308	4.67128	3.33879	2.26464	5.05181	4.95326	8.04862	2.86151	6.54017	5.93116	6.23028	8.13095	5.76283
	9.55118		9.12424	8.0653	7.36846	7.36898	8.82178	7.09082	5.50971	6.87511	8.0153	6.28542	5.4207	3.79056				7.83272	2.89701	6.65815	5.83916	6.77011	7.92021	6.01964
	9.57233		8.87808	7.87223	7.064	7.02874	8.36442	7.03782		6.02048	8.00494		5.19391	5.05402				7.96157	3.30262	6.41779	6.03287	7.14853	7.45692	5.99984
	9.46162		9.11578	7.24731	7.08948	7.09004	8.39667	7.05676		5.31871	8.02136		4.67732	5.69358				8.06286	3.74204	6.16199	5.96262	6.79319	7.13784	6.01318
				6.9334	7.16259	7.20007		7.09142		5.65165				5.64391						6.1695
				7.22506				7.45403		6.70379										6.53875
				7.31453						6.941										6.81265

## Sheet: RBF_RE
	Retinal Blood Flow (mL/mL/min)
Subject	1	2	3	4	5	6	7	8	9	10	11	12	*101	103	104	105	106	107	108	109	110	111	112	113
Group	C57BL/6J	C57BL/6J	C57BL/6J	C57BL/6J	C57BL/6J	C57BL/6J	C57BL/6J	C57BL/6J	C57BL/6J	C57BL/6J	C57BL/6J	C57BL/6J	DBA/2J	DBA/2J	DBA/2J	DBA/2J	DBA/2J	DBA/2J	DBA/2J	DBA/2J	DBA/2J	DBA/2J	DBA/2J	DBA/2J
				1.71959
				1.94166																1.85813
				1.98989				0.217164		1.68019					1.64092					1.78316
			2.10415	1.70788	1.49723	3.19396		0.470593		1.68691	2.42227				1.772					1.18152
	3.95407		2.44668	1.33367	1.61956	3.42026	2.1148	1.21293		1.23203	2.01411		2.41101	0.830922	1.24207			2.07977	0.831536	0.703875	2.82273		1.61798	-0.511609
	3.31549		2.34702	1.44817	1.88135	3.6428	2.35026	1.50046	1.74529	0.872181	2.16303		2.43472	1.67344	1.06315			1.54531	0.69219	0.264064	3.10991	1.61793	1.69579	0.162272
	2.77636		1.61449	1.76125	2.1061	3.27427	2.5819	1.55328	2.14413	0.993552	2.51505	2.89523	2.69571	1.85133	1.22585	0.981502		0.948002	0.633364	0.783537	2.88084	1.46112	1.86074	1.00716
	2.54384		0.969017	2.17259	2.1297	2.94015	2.81386	1.44523	2.19022	1.27907	2.73964	2.34762	2.49146	1.36824	1.34859	1.55129	0.517106	0.656342	0.773666	1.14238	2.21208	0.969224	1.90909	0.593941
	2.36399		1.01407	2.78563	1.81216	2.69302	2.49174	1.03874	2.09579	1.16296	2.87259	1.47649	1.91724	1.06652	1.32597	1.53818	0.891551	1.07142	0.874784	1.00429	1.9633	0.469951	2.06599	-0.241941
	1.93516	2.27087	1.11255	2.99576	1.80848	2.29478	2.13135	0.862249	2.04609	0.808701	2.90898	1.29607	1.18493	1.16109	1.2436	1.69599	1.43753	2.00698	1.12467	0.815978	2.27749	0.41965	2.09281	0.757002
	1.82057	1.8002	1.35246	2.79402	2.26027	2.14909	2.4854	1.1461	1.69366	0.632271	2.5741	1.79495	0.688339	1.58789	1.3851	1.30038	1.6693	2.7517	1.52438	1.21038	2.59416	0.575423	2.04365	1.89725
	2.6024	1.32352	1.62914	2.2839	2.04776	1.86452	3.13279	1.42567	1.53019	1.06975	1.82568	2.53098	1.65202	1.50219	1.69341	0.48351	1.54406	2.76175	1.13929	1.50939	2.37461	1.14628	1.75344	0.887121
	3.831	1.4117	1.78186	1.59935	2.04927	1.42706	3.54146	1.47122	1.20722	2.07204	1.74024	3.05372	3.90813	1.5166	1.6944	0.783373	1.16846	2.60963	0.767997	1.22671	2.11094	2.14647	1.6998	0.219202
	3.3028	1.84192	1.90775	1.50369	2.57722	1.5669	3.39641	1.53402	1.19959	2.40069	2.20344	3.12988	4.18731	1.99559	1.35326	1.34459	1.31329	1.84616	0.706725	0.888342	2.09751	2.7743	1.77903	-0.252194
	1.67418	2.11282	1.94887	1.94235	2.5666	1.7609	2.62036	1.73783	1.54979	2.36051	2.28618	2.97591	3.01095	1.43337	1.33746	1.44528	2.03342	1.82206	0.582149	1.24034	2.3101	2.27431	1.57778	-0.446607
	1.50593	2.29455	1.53878	2.09422	2.20739	1.43722	2.0811	2.10416	1.55654	2.01544	1.87922	2.90375	2.21977	1.09545	1.18765	1.18182	2.08098	1.88312	0.735303	1.71281	2.06221	1.5432	1.17892	-0.846572
	1.66387	2.41179	1.23004	1.90612	1.60441	1.16684	2.3239	2.01587	1.14553	1.41411	1.87823	2.89033	1.24715	1.44116	0.935175	1.01178	1.30566	1.79117	0.994905	1.53651	1.40214	1.68194	0.61726	-0.0550625
	1.44939	2.40506	1.39834	1.76861	1.6614	1.14705	2.63281	1.31887	1.36122	1.49352	2.60675	2.94641	0.947228	0.610369	0.319936	1.112	0.144133	1.99432	1.09244	1.3394	1.08125	1.9141	0.121853	0.310207
	1.65865	2.15456	1.7454	1.88071	2.75745	1.59064	2.35709	1.31566	2.65577	2.35434	2.76378	3.02328	2.46282	0.590084	0.214493	1.47492	-0.437947	2.49049	1.30861	1.34827	1.4364	1.93392	0.137017	0.213517
	2.33998	2.0932	1.82286	2.27519	3.20255	2.24764	2.04936	1.92179	3.15615	2.71973	2.30543	3.29871	3.97843	1.85297	1.22551	1.74448	0.542921	3.12226	1.33285	1.35418	1.90786	2.37089	0.737503	0.837398
	2.20213	1.74803	1.67331	2.33144	2.79584	2.34305	2.24926	2.03634	2.77657	2.13551	2.32409	3.62257	4.44985	2.12422	2.16154	2.5475	1.35011	2.96522	1.04854	1.25378	2.04984	2.33257	1.05539	1.14695
	2.20399	1.64861	1.36305	1.92567	2.18369	2.0497	2.577	1.56958	2.89925	1.96621	2.45109	3.67651	3.9077	1.74273	2.06258	2.82417	0.584244	2.49925	0.937619	1.2666	2.24682	2.14002	0.901711	1.01375
	2.85007	1.29647	1.51356	1.61851	1.29612	2.12503	2.75695	1.02553	2.33291	2.37734	2.67131	3.15254	2.89206	1.60225	1.64047	2.57419	0.524721	1.3122	1.00024	1.67682	2.52253	2.02613	0.759013	1.30938
	2.93556	0.706701	1.86967	1.57926	0.853431	1.86531	2.73652	0.729277	1.95811	2.42061	2.70126	2.97583	1.47589	1.93487	1.64488	2.39895	1.41835	0.623933	1.20147	2.01052	2.45583	2.05968	0.896783	0.904633
	2.61232	0.383208	2.02655	1.04905	1.43678	1.68729	2.45947	0.821029	2.21756	1.78397	2.7419	3.05152	0.501852	2.14087	2.03528	2.10097	1.68694	1.38041	0.965953	2.04771	1.89982	2.11926	1.10417	0.773029
	2.80726	0.622845	1.9972	0.322655	2.34351	1.5609	2.47519	1.23277	1.94175	1.90672	2.60772	2.51516	1.11801	1.76141	2.39777	1.8411	1.29508	1.52732	0.715417	2.06464	1.54935	2.03598	1.52282	0.516579
	3.09329	0.848216	1.99378	-0.0469412	2.64531	1.91331	3.32359	1.53753	1.95052	2.55602	2.14723	2.04876	2.27802	1.63211	2.68556	1.41793	1.00423	0.924291	0.619579	2.52912	2.13896	2.2472	1.90475	0.477897
	2.79637	0.962102	2.06551	0.249604	2.15498	2.20213	3.09308	1.41289	1.66571	2.04168	1.92651	2.62277	2.83163	1.23135	2.99206	1.18889	0.841256	1.30182	0.687963	2.79008	3.3925	2.45653	2.32051	0.673431
	2.28011	1.01632	1.84065	1.01841	1.50684	1.94108	2.05398	1.30059	1.38462	1.49824	1.98763	2.6228	2.44458	1.43428	3.1643	1.36446	1.08838	2.18392	1.05244	2.48285	3.60606	2.37522	2.5498	0.728399
	2.01493	0.996435	1.80296	1.58095	1.06582	1.97198	1.87337	1.28844	1.82823	1.71233	2.25295	1.90897	1.89653	2.72894	3.09473	1.46793	1.803	2.61789	1.50114	2.13558	3.1528	2.45494	2.50352	0.400072
	2.06372	0.55875	2.08592	1.84766	1.29849	2.75607	3.05564	1.21428	1.83395	1.97273	2.3967	0.992517	1.17025	3.18696	2.71728	0.882552	2.10744	2.84655	1.92072	1.95566	3.3188	2.78147	2.22633	-0.303792
	2.36225	0.440664	2.28292	1.64089	2.26639	3.12347	4.83451	1.2945	1.69334	2.21972	3.01829	0.354853	1.3131	2.80735	2.25318	0.611987	1.73258	2.61554	2.04799	1.68558	3.82376	2.40147	1.94852	0.279274
	2.58664	0.885163	2.54214	1.46885	2.45198	3.28906	4.95582	1.57005	1.892	2.54405	3.22795	0.6706	1.33977	2.49491	1.96673	0.68032	1.47045	2.13251	1.64042	1.46808	4.01401	1.64283	2.01229	1.75474
	2.73558	1.01268	2.53434	1.12603	2.09211	3.29997	4.14641	1.65556	2.57481	2.72309	2.86841	1.50533	1.56489	2.84483	2.07513	0.537251	1.58907	1.20339	1.11488	1.50174	3.47111	2.17256	2.31085	1.90787
	3.19327	1.22265	2.11907	0.794116	1.95478	2.80214	3.78964	1.61913	2.68778	2.59721	2.95026	2.10056	1.67786	2.98317	1.53519	0.283591	1.14845	0.639507	0.67472	1.70284	2.83389	2.64963	2.17722	1.25655
	3.0617	1.42531	1.72458	0.651367	2.36735	2.06557	3.73281	1.5489	1.79234	2.73945	3.01004	1.86625	1.52683	2.08803		0.589859	0.303912	1.52674	0.467628	1.8343	2.21956	2.61932	2.32112	0.179452
	2.47251	1.1596	2.41792	0.659358	2.32046	2.2979	3.5206	1.13882	0.806137	2.34166	2.73501	1.09246	1.91946	0.941691		1.58106	-0.174258	1.94521	0.638121	1.77434	2.0759	2.08471	2.04659	0.326864
	2.61718	0.573078	3.27118	0.778754	2.22469	3.17868	3.05089	0.767103	0.480062	2.10153	2.43332	0.327472	1.70072	0.8754		1.88381	0.0873448	1.22536	0.672805	2.02878	2.40545	0.964988	1.56384	1.43572
	2.88501	0.611852	2.55228	1.3218	1.92526	3.98819	2.43186	0.797129	0.361264	2.53541	2.06068	0.283779	0.470763	1.20016		1.62457	0.454455	1.32008	0.711808	2.50485	2.59255	1.19581	1.00698	1.43334
	2.45621	0.97626	1.64107	1.77057	1.32277	3.70904	2.27871	0.717135	0.638355	2.85046	1.59898	0.743952	0.809451	1.12196		1.23042	0.757532	1.84844	0.283892	2.08521	3.37821	2.66566	0.921262	0.0683961
	2.08343	1.03619	1.88103	1.50004	1.18541	2.81597	2.52804	0.979666	1.33632	3.01047	1.18864	0.755796	1.34431	0.958371		1.52577	1.34374	2.22785	-0.0842649	1.58392	4.07832	2.90614	1.57723	-0.604869
	1.97881	0.887736	1.80448	1.09966	1.39088	3.12848	2.83934	1.45194	1.65425	3.14313	0.993991	0.572233	1.84828	1.63769		2.39058	2.11597	2.12846	0.448281	1.67834	3.4663	2.43034	2.51075	0.0683869
	2.18995	0.823248	1.52901	1.08052	1.42857	3.38306	3.3837	1.56609	1.70517	2.75924	1.28889	0.517707	2.31119	2.05972		2.61466	2.35731	1.73864	0.962441	1.78482	2.80144	1.5971	3.05366	0.844416
	2.5614	0.994939	1.8606	1.02815	1.50687	2.42053	3.79745	1.55297	1.80546	2.14555	1.67446	0.780827	1.98898	1.32041		2.07992	1.55651	1.77838	1.1043	1.47876	2.85313	1.32164	2.97092	0.893636
	2.62756	1.17271	2.14784	0.646976	1.81888	2.45179	3.40971	1.44923	1.70852	1.71015	1.55869	0.890405	1.41142	0.847239		1.91245	1.05402	2.45004	1.04551	1.30281	3.15487	1.72196	2.79513	0.911696
	2.15768	1.45036	2.01737	0.380739	2.35669	2.55826	2.69383	1.17673	1.53283	1.88772	1.16715	0.964842	1.80672	1.33853		1.76968	1.1225	3.20381	0.752866	1.68901	3.24394	2.25255	2.761	0.977857
	1.57718	1.70616	2.10054	0.545186	2.4643	2.0628	2.28595	0.921674	1.15173	2.16551	0.674582	0.890895	2.56262	1.2372		1.28336	0.739558	3.08217	0.582178	1.59895	3.13062	2.12951	2.88354	1.05388
	1.50037	1.61579	2.37767	1.08372	2.78417	1.87101	1.73921	0.330866	1.08205	1.99251	0.62902	0.983416	2.43917	0.489667		0.85995	1.19235	2.7157	0.584054	1.43723	3.08865	1.50955	2.93762	1.28271
	1.5916	1.27585	2.40512	1.30512	3.19551	1.77808	1.64997	0.205339	1.68047	1.57454	1.19337	1.33789	2.64525	0.842918		0.762127	1.65211	2.96518	0.385922	1.57504	3.71441	0.973603	2.75479	1.07558
	1.79971	1.30426	2.0742	0.793608	2.81669	1.53597	2.23462	0.354752	2.22948	1.42413	1.3492	1.42269	2.3452	1.13804		1.03513	1.80833	3.39834	0.262487	1.65878	3.75083	0.806057	2.32902	0.745083
	1.90342	1.97635	1.71798	0.0717114	2.47275	1.12793	2.52668	0.963242	2.37397	1.36765	1.38517	1.39306	2.29053	1.03772	0.826314	1.71732	1.68009	4.07492	0.534078	1.85276	2.81031	1.23781	2.16912	1.45917
	2.2592	2.20464	1.35011	-0.127283	2.03186	1.02646	2.20748	0.834779	2.15733	0.830102	1.64888	1.07892	2.73841	1.58599	0.74616	1.7937	1.33592	3.87955	0.547958	2.00645	1.56309	1.66087	2.29527	2.98727
	2.64927	1.65958	1.17025	0.225222	1.6641	1.08878	2.13132	0.879619	1.87816	0.507769	1.97088	0.904367	2.85927	2.41664	1.07023	1.47161	1.40504	2.51008	0.324432	1.89765	0.875722	2.0797	2.28634	3.33787
	2.19491	1.25196	1.14194		1.78075	1.64509	2.33274	0.749186	1.97309	1.06042	2.15628	0.738528	1.54634	2.63647	1.72207	1.58987	1.43013	1.66924	0.148149	1.68842	1.11182	2.35924	2.26682	2.54513
	1.71881	1.19704	1.0464		2.05631	2.69382	2.84504	1.335	2.25767	1.59088	2.22197	0.556059	0.288934	2.18856	2.3742	1.78012	1.46807	1.94093	-0.0888361		1.96182	2.44578	1.99711	2.11392
	1.75615	1.43176	1.0201		2.34706	2.66043	3.27764		2.17343		2.52995	0.859207	-0.470807	1.37738	3.35658	1.97971	1.37075	2.05926	0.000783087		2.88149	1.81943	1.79991	1.85425
	2.37878	1.76751					3.049		2.0474			1.29169	-0.770219		3.78373	2.26085	1.22917	1.56896	0.458201		2.70905	1.23096	2.09308	1.45075
		1.71677							2.0353			1.75737			2.97155	2.23119	1.17019					1.00469
		1.81263										1.99315			1.8558	2.00399	0.984118
		2.43563													1.08453		0.740786
		2.99456													0.836563
		3.2781
		2.10558
		1.98698
		1.52092
		1.34892													2.0049	1.62295	-0.287785
		1.54534							2.27426			0.39918			1.68581	2.0787	-0.699993
		1.9052							2.46234			0.92851			1.04852	2.41841	-0.727447
	1.30589	2.21369	1.58878				2.42211		1.77756		2.70047	1.3928	1.02379		0.52107	2.56936	-0.560737	1.16373	0.986241		2.60528	1.42672	1.78236	1.29265
	1.07969	1.8481	1.30041		0.352735	1.28777	2.15728		1.50016		2.5419	1.55832	1.6694	0.917752	0.781673	2.61098	0.0872089	1.49823	1.38592		2.50612	0.814055	2.24085	2.07157
	0.741981	1.0248	0.946624		0.726785	1.74379	1.61903	1.75431	1.70433		2.12346	1.36206	2.41543	1.45527	1.37754	2.09877	1.02906	1.26128	1.65171		2.3728	-0.0549748	2.20548	2.06836
	0.618024	0.507733	0.967406	1.25715	1.29802	2.07034	1.23245	2.93368	2.04	2.86012	2.27774	0.85136	2.97955	1.80013	2.43196	1.53745	1.93047	0.770756	1.60183	1.42987	1.87727	-0.189858	2.01438	1.92734
	0.749464	0.133898	1.15781	1.09569	2.17535	1.74447	1.15878	3.24695	2.20862	2.70932	2.65255	0.867116	2.49486	2.19037	3.23374	1.17676	2.68779	-0.104142	1.62284	1.55478	1.3261	0.541083	1.72996	2.35048
	1.36123	0.0947705	1.28421	0.769342	2.58724	1.07178	0.99412	2.88639	2.21991	2.06122	2.40648	1.0947	0.541965	2.43363	2.90987	1.04901	2.74354	-0.600928	1.65194	1.89545	1.37239	1.81066	1.48024	2.78164
	2.01438	0.475994	1.40416	0.837821	2.33467	1.36749	1.04259	2.38107	2.01724	1.61456	1.98555	1.23518	-0.0982435	2.66353	2.21554	1.1853	2.33561	0.0709777	1.13972	1.98339	1.95021	2.9716	1.58366	2.9331
	2.10998	1.08169	1.50063	1.10898	1.84527	1.80878	1.30469	2.05439	1.76279	1.31008	1.40191	1.23827	0.50811	2.62801	1.94724	1.58444	1.93745	0.787746	0.754476	1.61471	2.15361	3.24467	1.73528	2.85701
	1.8852	1.79848	1.84934	1.19699	1.26869	1.66183	1.27502	1.91488	1.71587	1.315	0.929062	1.26878	0.480732	2.07574	1.75121	2.40706	1.49739	0.938029	0.360534	1.09718	1.91298	2.97037	1.26774	2.41512
	1.3635	2.17623	1.93621	1.01856	1.00087	1.44986	0.679883	1.99279	1.55211	1.18139	0.820404	1.58559	-0.166162	0.877649	1.90493	2.66099	1.34641	1.10963	0.407291	0.616637	1.68474	2.32734	0.665964	1.65294
	1.05137	2.05546	1.70984	0.772644	1.30693	1.08068	0.215322	2.03249	0.931552	1.03738	0.889287	1.92952	-1.76194	-0.0885824	2.17911	1.53478	1.59934	1.49758	0.603893	0.671042	1.76367	1.61323	0.204172	1.83571
	1.56037	1.60777	1.25404	0.353544	1.6112	0.815367	-0.100709	2.1522	0.507563	1.19976	1.21583	2.11422	-2.88151	-0.710851	1.86655	0.74975	1.52488	2.0232	1.02999	1.37262	1.79406	0.573958	0.214993	2.17695
	2.18932	0.562433	0.788421	0.389628	1.50785	1.38051	0.25571	1.97125	0.557264	1.44457	1.5618	2.02128	-1.04017	-0.806706	1.49631	1.12183	1.20624	2.18587	1.31763	1.6617	1.55026	-0.334528	0.521084	2.2927
	2.63424	-0.113829	0.76007	0.858553	1.30162	1.96745	1.39974	1.61061	0.622756	1.76382	1.79106	1.75679	1.2372	-0.154753	1.16892	1.85087	0.938744	1.20541	1.31316	1.38383	1.5539	-0.126459	0.906016	2.13943
	3.01748	0.271695	1.06645	1.45588	1.26387	1.94055	1.8268	1.6236	1.09446	1.69272	1.80054	1.44585	2.55063	0.286384	0.777253	2.29498	0.180219	0.455091	1.04731	1.19246	2.0674	1.14782	0.84368	1.71088
	2.46964	1.06314	1.24746	2.32839	1.38529	1.61148	1.19504	1.84664	1.30494	0.756357	1.27061	1.48195	3.32282	0.4572	0.884422	2.1355	-0.478566	0.155805	0.375228	1.00055	2.46676	1.51428	0.763066	1.64882
	1.46777	2.2304	1.30341	2.34053	1.58643	1.23131	0.801758	2.05258	0.907345	-0.390548	0.855912	1.40374	3.48282	0.843608	1.21154	1.48699	-0.614139	1.01388	-0.276401	0.902005	2.76176	1.15469	0.674132	1.57694
	0.7548	2.78989	1.34545	1.61218	1.76945	0.969393	0.829825	2.14624	0.770223	-0.155308	1.03198	1.09509	3.61817	1.55708	1.62523	1.06961	-0.331104	2.18693	-0.438999	0.946749	2.41906	0.668096	0.598595	1.62633
	0.289074	2.43836	1.41202	1.13191	1.69198	1.65043	1.05423	2.04268	0.804429	0.651909	1.30444	0.9073	3.36877	2.08335	2.15128	0.539947	0.193455	2.14304	-0.622767	0.863486	1.79184	0.0956183	0.551048	1.37576
	0.661266	1.9236	1.4104	0.856845	1.45706	2.17527	1.44063	1.80692	0.973079	1.47024	1.38608	1.07974	2.48076	1.92221	1.90543	0.0862883	0.79687	1.65767	-0.201937	0.524393	1.57121	0.10019	0.502153	1.1134
	1.25366	1.28521	1.21019	1.01734	1.32045	1.99731	1.12237	1.83442	1.42049	2.09445	1.2035	1.26841	1.72333	1.18214	1.02252	-0.286455	1.43732	1.28583	0.350515	0.57477	1.85379	0.645783	0.441043	1.17415
	1.32836	0.88809	1.08958	1.63201	1.2634	1.79875	0.187706	2.03076	1.68966	1.27691	0.534735	1.37037	1.30858	1.31507	0.364757	-0.174792	1.56077	1.10922	0.913446	0.927042	2.02874	0.488089	0.246389	1.53558
	1.22126	0.639784	1.05939	1.63203	1.17099	1.78315	-0.0920424	1.87796	1.89467	0.167218	0.0361597	1.46067	1.21169	1.38913	-0.035245	0.468812	1.35024	1.76231	1.30399	1.02638	2.2852	0.0783542	0.46975	1.61315
	1.14256	0.89608	1.23348	1.73227	1.14861	1.8027	0.170569	1.49457	2.16038	0.336073	0.245421	1.56997	1.522	0.914354	0.0195691	1.16147	1.21324	2.52788	1.04448	0.721913	2.24827	-0.17879	0.786228	1.50069
	0.441347	1.80553	1.60479	1.58334	1.54999	1.73896	0.636463	1.20829	2.34813	1.14283	0.644367	1.79455	2.06298	0.591531	0.620732	1.93273	1.40427	1.92945	0.699853	0.413291	1.71347	-0.236697	0.889037	1.17152
	0.44445	2.38906	1.72659	1.06506	1.823	2.02227	1.2861	1.09395	2.22524	1.66689	0.912595	1.73974	2.56525	-0.223832	1.04772	1.81384	1.79669	0.829347	0.26074	0.442717	1.31659	-0.0891384	0.888926	0.138135
	0.89798	2.31983	1.46314	0.645115	2.12104	2.07962	1.47824	1.20437	1.9391	1.95337	1.1685	1.2438	2.17523	-0.766912	1.19957	0.965019	1.89918	0.37134	-0.0761561	0.569973	1.06619	0.104023	0.67305	-0.380192
	1.37258	2.10122	1.35118	0.76008	2.49851	1.96965	1.14243	1.59657	1.98637	1.06589	1.13369	1.03204	0.291125	-0.150186	1.03499	0.351526	1.42085	0.371171	0.114344	0.693444	0.933118	0.476203	0.22099	0.0311673
	1.89635	1.65028	1.4723	0.746712	2.45893	2.13614	0.750751	1.53896	2.19413	-0.171995	1.0699	1.49124	-1.33991	0.619564	0.875694	-0.040948	0.484845	1.09381	0.509906	0.671844	0.98701	0.974215	0.286895	0.339941
	1.65003	1.56928	1.54482	1.43932	2.1777	2.1614	0.333706	1.53896	2.42806	-0.0126355	1.27643	1.73873	-1.32096	1.01769	0.78434	-0.0322168	0.159512	2.02511	0.837696	0.612194	0.870089	1.22648	0.524232	0.377847
	0.945479	1.58087	1.60536	1.64088	2.01298	1.66452	0.382664	1.42885	2.46059	0.650008	1.26732	1.37778	-0.651628	1.47063	1.02314	0.465085	0.715294	1.80981	1.20068	0.804091	0.599089	1.29859	0.746197	0.583297
	0.776881	1.73398	1.50888	1.69277	1.93998	1.23298	0.682409	1.148	2.00329	0.884064	1.19195	0.845726	0.807016	1.65169	1.25248	0.486798	1.17794	1.25391	1.52206	0.552781	0.497116	1.25431	0.914727	1.0521
	0.954293	1.72588	1.14569	1.68936	2.30088	0.652905	0.798144	1.28445	1.46963	0.989983	1.19269	0.728472	2.00689	1.49393	1.20247	0.138648	1.23482	1.43227	1.75443	0.0173156	0.772589	1.02244	0.941411	1.50038
	1.08143	1.51661	1.1409	1.2578	2.67317	0.595836	0.93784	1.46446	0.956084	1.02661	1.25767	0.99564	2.13245	0.999051	0.945499	0.130883	0.608542	1.59661	1.77393	-0.39282	1.22976	0.633346	0.989509	1.88528
	1.13681	1.1968	1.76206	1.12737	2.58062	0.868386	0.842832	1.74345	0.294372	1.08553	1.32533	1.16223	1.85126	0.574207	0.71408	0.295881	-0.170912	1.84828	1.55772	-0.408496	1.53647	0.269043	1.09177	1.78912
	0.854595	1.06621	2.05817	1.1651	2.13896	1.45637	0.488718	2.13252	0.337061	1.65321	1.49105	0.91497	1.21396	1.10646	0.62399	0.557026	-0.377312	2.09641	1.1134	0.198926	1.52664	0.298588	1.17676	0.940837
	0.46533	1.04753	1.70727	1.23945	1.62386	1.5107	0.683488	1.7422	1.32944	2.35239	1.53286	0.590624	0.629562	1.61181	0.651548	0.860436	0.968835	1.76116	0.565123	0.725983	1.25553	0.887958	0.911771	0.327993
	0.753561	1.09269	1.21053	1.41098	1.12705	1.23819	1.10905	1.47546	2.118	2.17698	1.28652	0.613029	0.0572302	1.43967	0.75154	0.917803	1.5231	0.904151	-0.0116241	0.713348	0.871047	1.02468	0.664659	0.48647
	1.68982	1.15837	1.00194	1.51188	0.985523	1.2828	1.27415	1.29783	2.5299	1.50633	0.913447	0.963226	-0.467323	1.09236	0.756124	0.977029	1.06715	0.452803	-0.212991	0.405897	0.675012	0.330403	0.779583	0.805515
	2.15409	1.36537	0.952532	1.39423	0.999456	1.33994	1.26375	1.23375	2.43007	1.16822	0.823668	1.38347	-0.803107	0.663141	0.689056	0.986459	0.694297	0.556486	0.182448	0.315413	0.743039	-0.491277	1.00102	0.917874
	2.10206	1.70728	1.3057	1.05759	0.910952	1.16791	1.50751	1.1924	1.7237	0.931805	0.900793	1.52578	-0.409359	0.558471	0.511092	0.860158	0.833158	0.814355	0.733946	0.314778	1.11758	-1.02547	1.13136	1.00054
	1.88388	1.65964	1.49785	1.82877	0.691201	1.07249	2.02279	0.920028	1.35274	0.909075	0.915202	1.68607	0.406882	0.849933	0.565972	0.580926	0.932618	1.33656	1.23991	0.534093	1.41004	-0.886278	1.13257	1.14933
	1.54324	1.40474	1.19418	2.19833	0.64303	1.05721	2.22827	0.819259	1.37609	0.89319	0.845541	1.69988	1.22799	0.75582	0.82164	0.359224	0.421907	1.12806	1.26582	0.800036	1.43561	-0.331999	0.7761	1.2224
	1.09353	1.31469	0.782188	1.25023	0.794148	1.03242	2.05935	0.998082	1.45196	0.702732	0.689332	1.77852	1.43642	0.590586	1.22589	0.307402	-0.25195	0.468295	0.75143	0.810027	1.37711	0.498821	0.430202	1.21418
	0.777578	1.73824	0.675667	0.683598	1.23394	1.04975	1.85213	1.45514	1.65723	0.593802	0.440139	1.7038	0.98861	0.594586	1.33827	0.244218	-0.298004	0.08507	0.300148	0.736925	1.01078	1.30805	0.318091	1.18362
	0.749736	2.20045	0.81587	0.917011	1.93421	1.04967	1.84189	2.04208	1.79144	0.865373	0.518524	1.5087	1.43762	0.482834	1.28506	0.108606	0.0776795	0.112476	0.252045	0.694643	0.508907	1.60437	0.314103	0.854681
	0.876543	2.05265	1.10234	1.33186	2.11771	1.2412	1.93482	2.13503	1.25091	1.24229	0.864265	1.4093	1.96795	0.0436204	1.29599	0.0364088	0.655812	0.199189	0.505538	0.638403	-0.0866755	1.54708	0.319114	0.31481
	0.963027		1.52628	1.33475	1.78017	2.10059	1.11667	1.77003	0.563589	1.53579	0.968268	1.5765	1.80837	0.605603	1.33975	-0.274306	1.25904	0.220458	0.852975	0.601666	-0.250857	1.30959	0.346595	0.049188
	1.37964		1.61309	1.11875	1.60904	2.60916	0.503754	1.66616	0.0633166	1.68965	0.810614	1.65311	1.24296	0.0414714	1.20576	-0.624187	1.44892	0.528019	1.09943	0.580393	0.436007	1.10349	0.569278	-0.083685
	1.54177		1.30459	1.22	1.8125	2.792	0.220906	1.61324	0.0985208	1.89513	0.690877	1.56145	1.02054	-0.514225	0.880705	-0.49594	1.47559	0.81893	0.772739	0.427951	0.813834	0.892766	0.769129	-0.0798294
	1.41641		1.21107	1.53131	2.10952	2.79679	0.433238	1.59298	0.961937	2.15143	0.789468	1.40439	1.39177	-0.836609				0.960383	0.188667	0.306727	0.964802	0.940887	0.636279	-0.230514
	1.39711		1.12268	1.66326	2.27753	2.39844	1.28616	1.90542		2.26952	0.766788		1.51392	-0.0623161				1.07428	-0.0593344	0.38343	0.86498	1.00394	0.60376	-0.0848852
	1.33213		1.10256	1.56694	1.9392	1.94524	1.66588	2.14887		2.07522	0.743641		1.51428	1.07566				1.07882	-0.0188356	0.548432	0.756129	0.811065	0.497016	0.228816
				1.30371	0.867533	1.76154		2.121		1.7549				1.80126						0.862817
				0.55373				1.85006		1.50174										1.11281
				-0.0558117						1.45604										0.926829
